# Supplementary material for: A 3D all-inorganic architecture based on the [H2W12O42]10− building block with different alkaline-earth metal linkers: crystal structures, surface photovoltage and photoluminescent properties
Source: Royal Society of Chemistry journal article supplement (doi:10.1039/c3ce40222c), 2013-01-01
Supplement: c3ce40222c.pdf [file c3ce40222c.pdf]

## Supporting Information

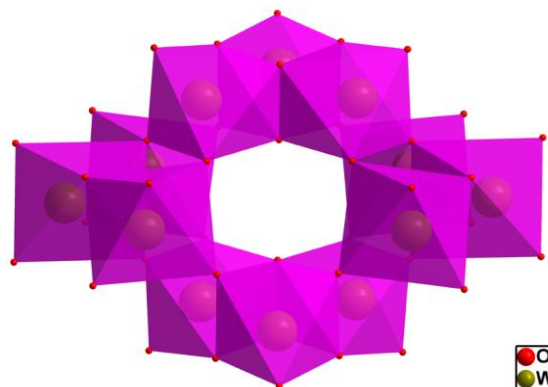

**Figure S1.** Polyhedral the paradodecatungstate-B [H<sub>2</sub>W<sub>12</sub>O<sub>42</sub>]<sup>10-</sup> anions, Colour codes: {WO<sub>6</sub>}octahedra (pink), O (red).

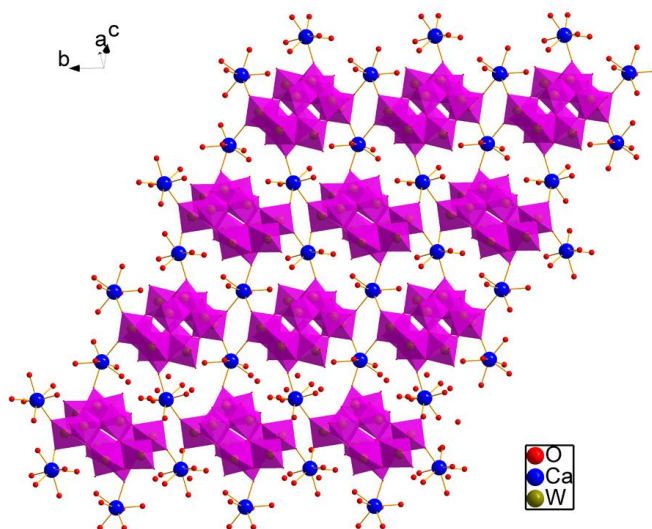

**Figure S2.** Polyhedral and ball-and-stick representation of the 2D network structure of compound **1**, Na atoms and Lattice water molecules are omitted for clarity, Colour codes: {WO<sub>6</sub>}octahedra (pink), Ca (blue), O (red).

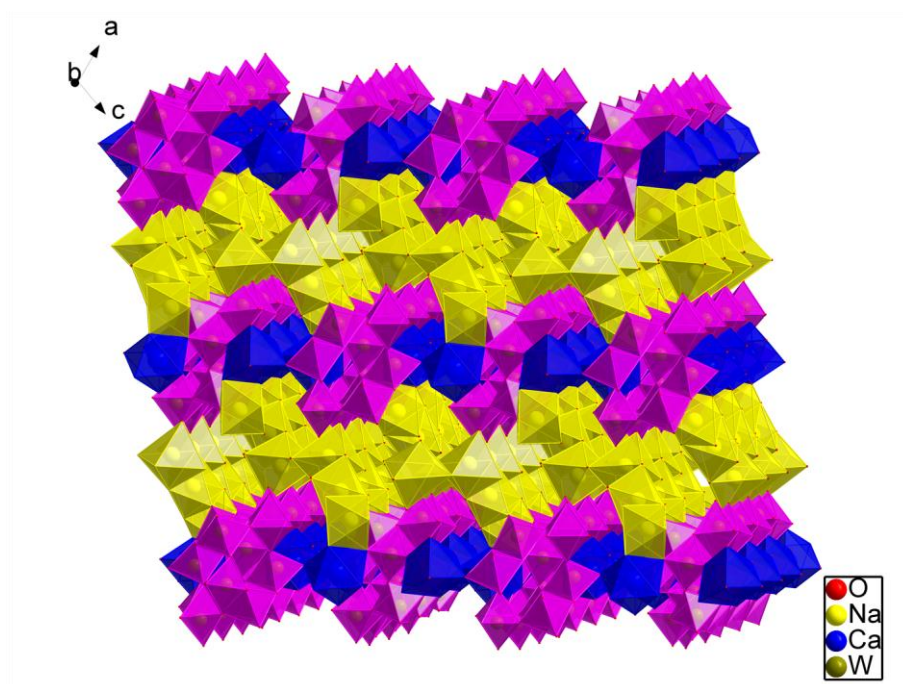

**Figure S3.** 3-D packing arrangement of **1**. The polyanions, Ca atoms and Na atoms are represented with polyhedron; All the isolated water molecules are omitted for clarity.

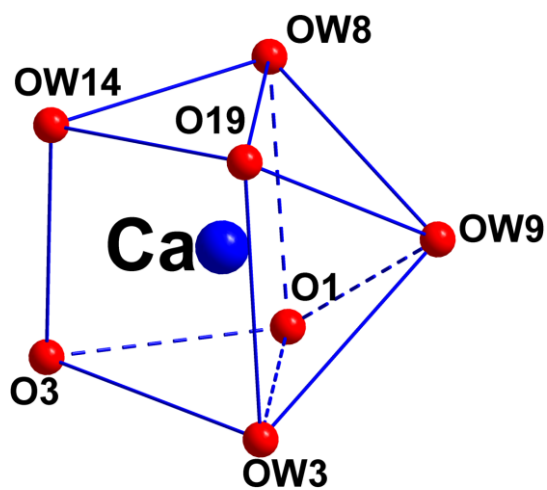

**Figure S4.** The coordination polyhedrons around Ca atom in **1**

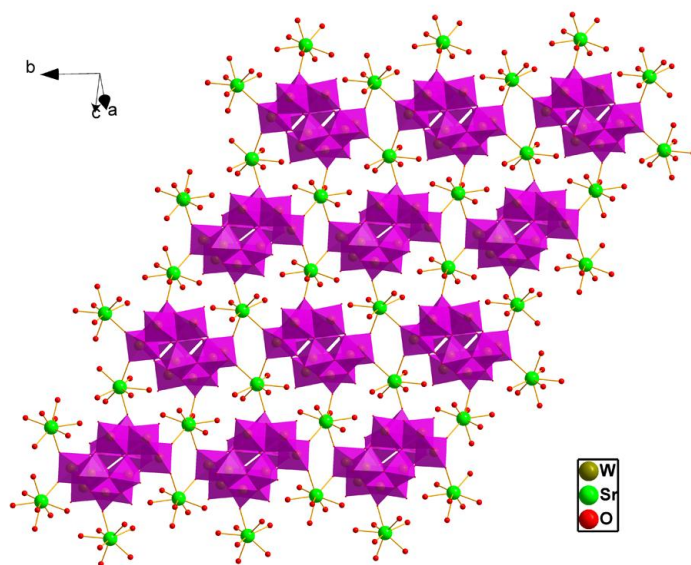

**Figure S5.** Polyhedral and ball-and-stick representation of the 2D network structure of  $[\text{H}_2\text{W}_{12}\text{O}_{42}]^{10-}$  polyanions coordinated with Sr1 atom in compound **2**, Lattice water molecules are omitted for clarity, Colour codes:  $\{\text{WO}_6\}$  octahedra (pink), Sr (green), O (red).

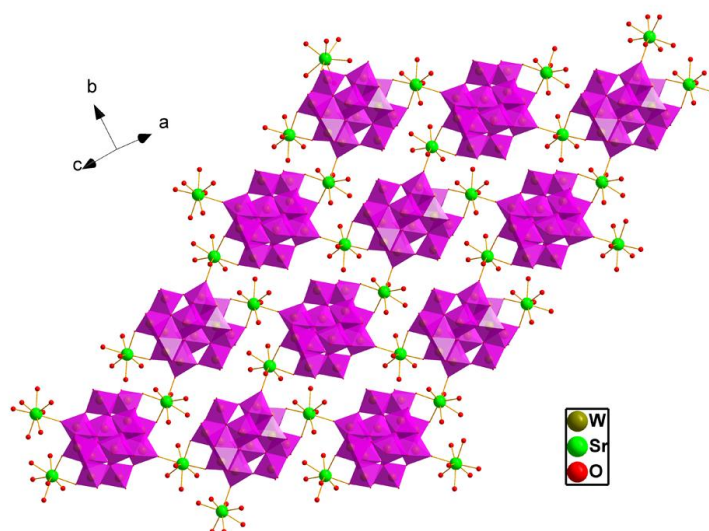

**Figure S6.** Polyhedral and ball-and-stick representation of the 2D network structure of  $[\text{H}_2\text{W}_{12}\text{O}_{42}]^{10-}$  polyanions coordinated with Sr2 atom in compound **2**. Lattice water molecules are omitted for clarity, Colour codes:  $\{\text{WO}_6\}$  octahedra (pink), Sr (green), O (red).

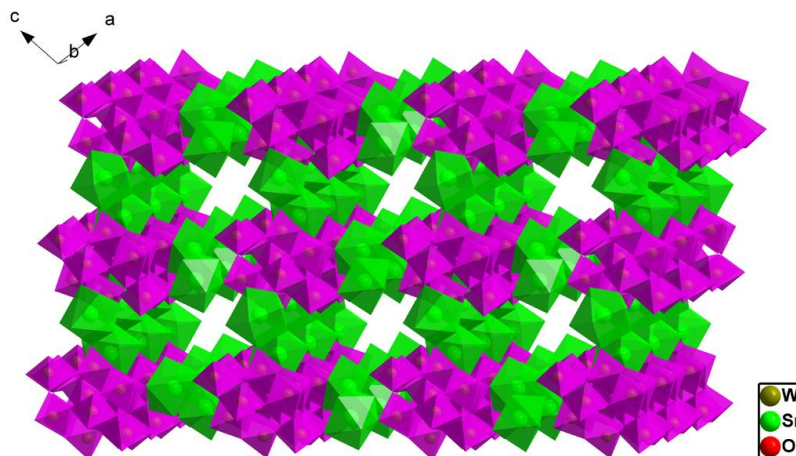

**Figure S7.** 3-D packing arrangement of **2** with 1-D channels viewed along the b axis. The polyanions and Sr atoms are represented with polyhedron; The solvent water molecules are omitted for clarity.

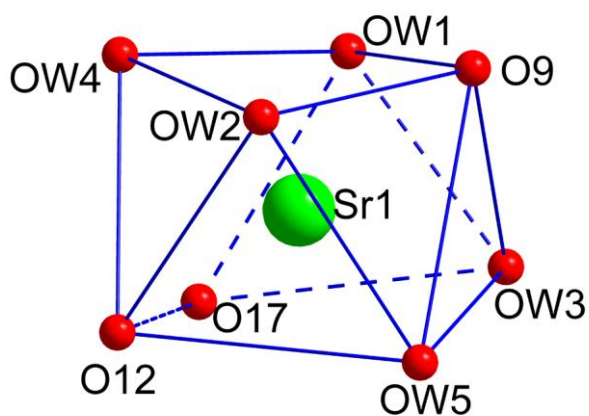

**Figure S8.** The coordination polyhedrons around Sr1 atom in **2**

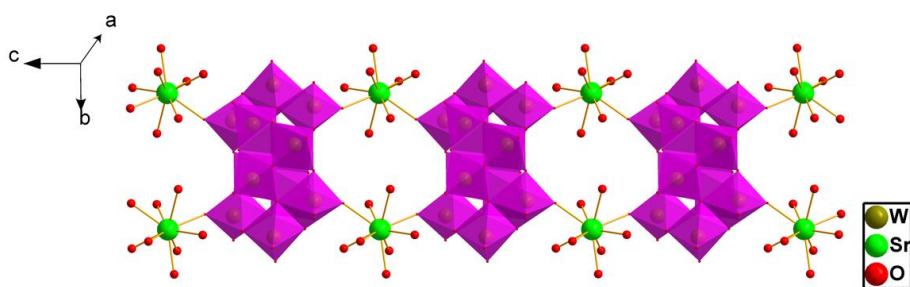

**Figure S9.** (a) Polyhedral and ball-and-stick representation of the infinite 1D chain structure of  $[\text{H}_2\text{W}_{12}\text{O}_{42}]^{10-}$  polyanions coordinated with Sr1 atom in compound **3**, Lattice water molecules are omitted for clarity, Colour codes:  $\{\text{WO}_6\}$  octahedra (pink), Sr (green), O (red).

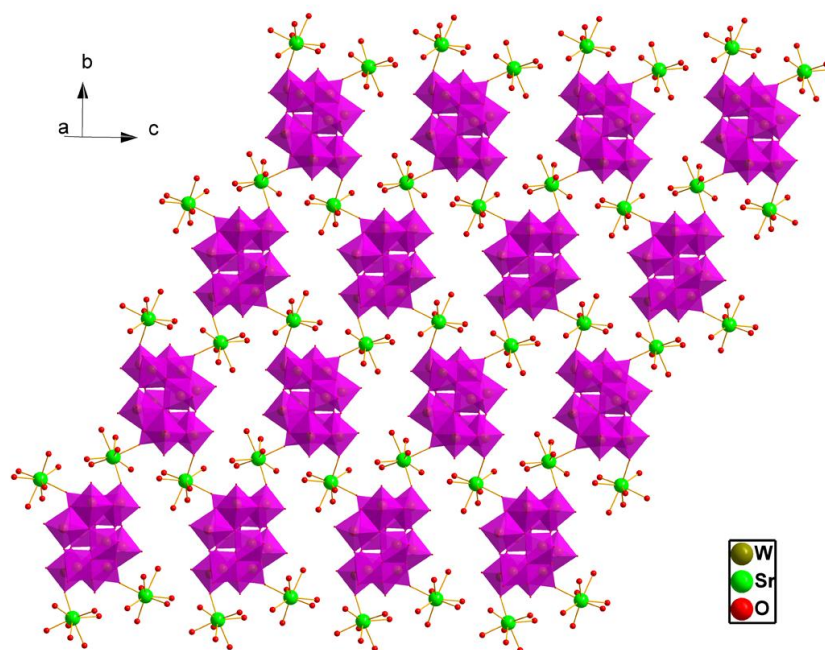

**Figure S10.** Polyhedral and ball-and-stick representation of the 2D network structure of  $[\text{H}_2\text{W}_{12}\text{O}_{42}]^{10-}$  polyanions coordinated with Sr2 atom in compound **3**. Lattice water molecules are omitted for clarity, Colour codes:  $\{\text{WO}_6\}$  octahedra (pink), Sr (green), O (red).

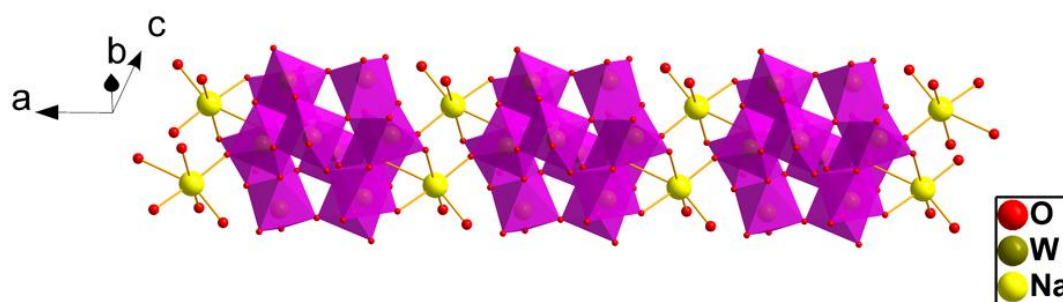

**Figure S11.** (a) Polyhedral and ball-and-stick representation of the infinite 1D chain structure of  $[\text{H}_2\text{W}_{12}\text{O}_{42}]^{10-}$  polyanions coordinated with Na atom in compound **3**, Lattice water molecules are omitted for clarity, Colour codes:  $\{\text{WO}_6\}$  octahedra (pink), Na (yellow), O (red).

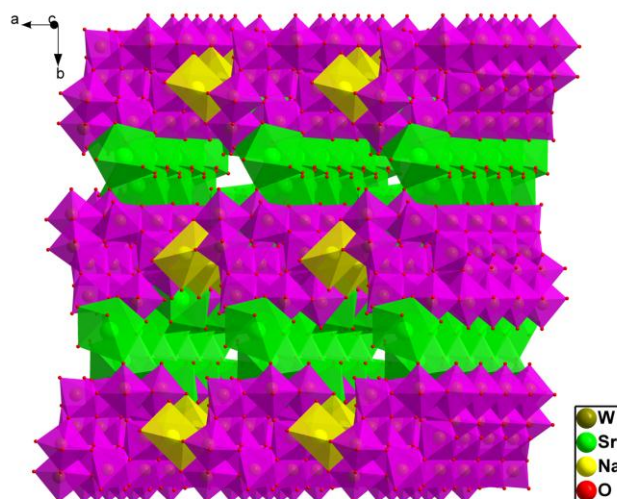

**Figure S12.** 3D packing arrangement of **3**. The polyanions, Sr atoms and Na atoms are represented with polyhedron; The solvent water molecules are omitted for clarity.

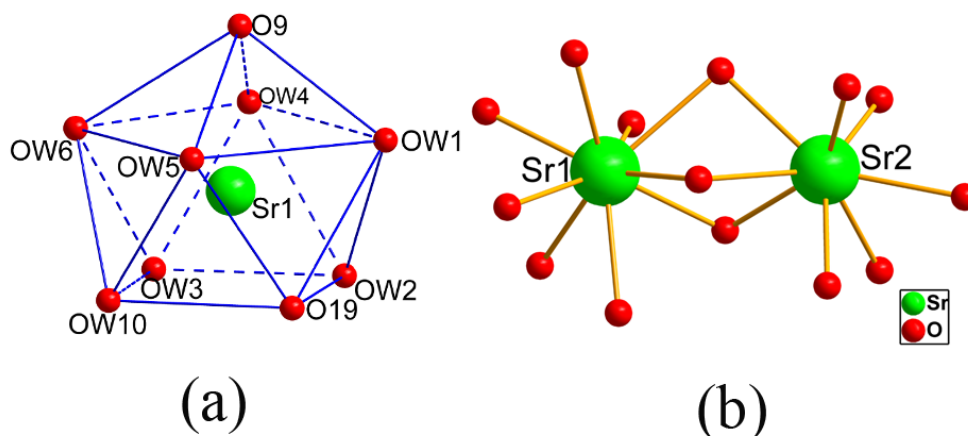

**Figure S13.** (a) The coordination polyhedrons around Sr1 atom in **3** (b) the adjacent Sr1 and Sr2 atoms in **3** were connected through three  $\mu_2$ -O atoms.

### FT-IR Spectroscopy

The IR spectrum of **1** (Figure S14) showed the characteristic peaks of the different W–O bonds of  $[\text{H}_2\text{W}_{12}\text{O}_{42}]^{10-}$  at 600–1000  $\text{cm}^{-1}$ . The bands at ca. 940, 870, 826 and 694  $\text{cm}^{-1}$  should be assigned to  $\nu(\text{W}-\text{O}_t)$ ,  $\nu(\text{W}-\text{O}_t')$ ,  $\nu(\text{W}-\text{O}_c)$  and  $\nu(\text{W}-\text{O}_b)$ , respectively.<sup>1</sup> A broad band at 3422  $\text{cm}^{-1}$  is due to the

aqua ligands. The peak at  $1627\text{ cm}^{-1}$  associates with the crystalline lattice water molecules. The IR spectra of complexes **2–4** (as shown in Figure S11) are similar to that of compound **1**.

### References :

- (1) L. Yuan, C. Qin, X. L Wang, E. B. Wang and Y. G. Li, *Solid. State. Sci.* 2008, **10**, 967.

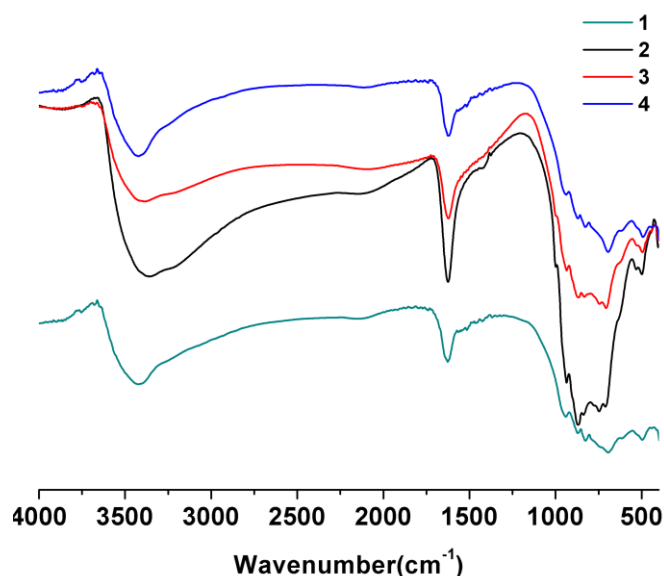

**Figure S14.** IR spectra of compounds **1**, **2**, **3** and **4**.

### Optical Band Gap

To explore conductivity potentials of compounds **1–4**, the measurement of diffuse reflectivity for a powder sample was used to obtain band gap ( $E_g$ ) (Figure S15), which was determined as the intersection point between the energy axis and the line extrapolated from the linear portion of the adsorption edge in a plot of Kubelka-Munk function  $F$  against energy  $E$ .<sup>1-3</sup> Kubelka–Munk function,  $F = (1-R)^2/2R$ , was converted from the recorded diffuse reflectance data, where  $R$  is the reflectance of an infinitely thick layer at a given wavelength. For compounds **1–4**, the band gap can be assessed at 3.36, 3.56, 3.55, 3.39 eV, respectively. The reflectance spectra reveal the nature of

semiconductivities with a large energy gap for compounds **1–4**.

**References :**

- (1) J. H. Liao, J. S. Juang and Y. C. Lai, *Cryst. Growth Des.* 2006, **6**, 354;
- (2) Y. Xia, P. F. Wu, Y. G. Wei, Y. Wang and H. Y. Guo, *Cryst. Growth Des.* 2006, **6**, 253;
- (3) L. J. Zhang, Y. G. Wei, C. C. Wang, H. Y. Guo and P. Wang, *J. Solid State Chem.* 2004, **177**, 3433.

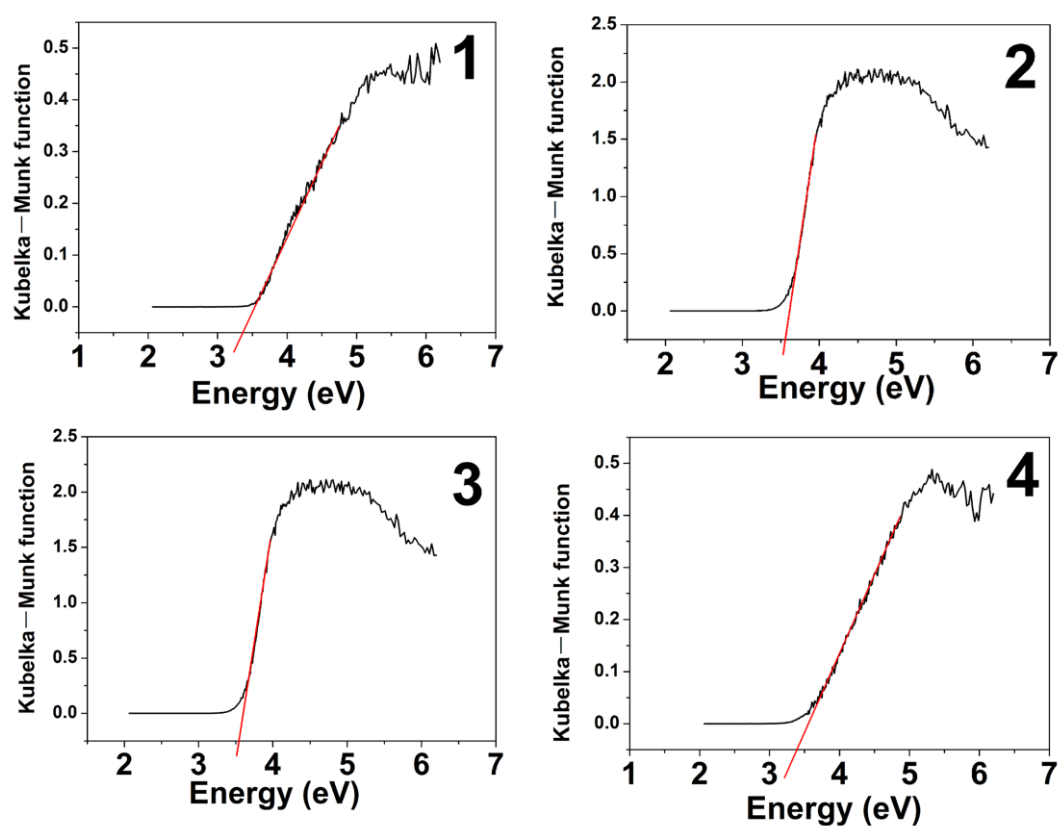

**Figure S15.** UV-Vis diffuse reflectance spectra of K-M functions versus energy (eV) of the compounds **1–4**



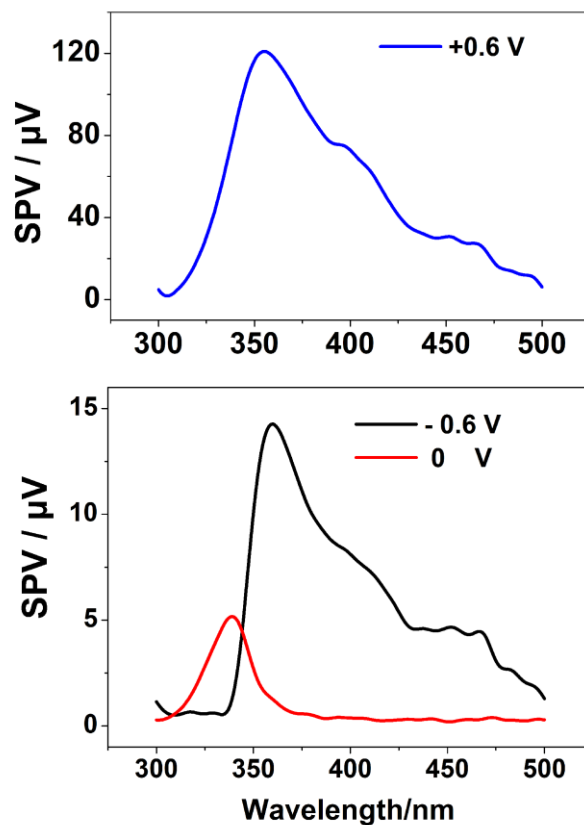

**Figure S16.** SPS and EISPS of the compound  $\text{Na}_{10}[\text{H}_2\text{W}_{12}\text{O}_{42}] \cdot 20\text{H}_2\text{O}$  under zero, positive and negative electric fields.

The  $\text{Na}_{10}[\text{H}_2\text{W}_{12}\text{O}_{42}] \cdot 20\text{H}_2\text{O}$  was synthesized according to the literature<sup>1</sup> and characterized by IR spectrum.

**Reference:**

- (1) H. T. Evans Jr, O. W. Rollins, *Acta Crystallogr. Sect. B.* 1976, **32** 1565.

### Thermogravimetric analysis

In order to analyse the thermal stability of the compounds **1-4**, The thermal gravimetric analysis(TGA) were carried out for below 600°C. The TGA curves of **1-4** (Figure S17-S20) show weight loss of 14.33%, 13.11%, 14.78% and 13.75% in the range of 29-422°C, 20-427°C, 42-428°C and 38-424°C, respectively, which are assigned to all the lattice water molecules. They are in good agreement with the calculated value of 14.86%, 12.66%, 14.15% and 13.26% for the compounds **1-4**, respectively. The results of the TGA of the compounds **1-4** agree with those of structural determination.

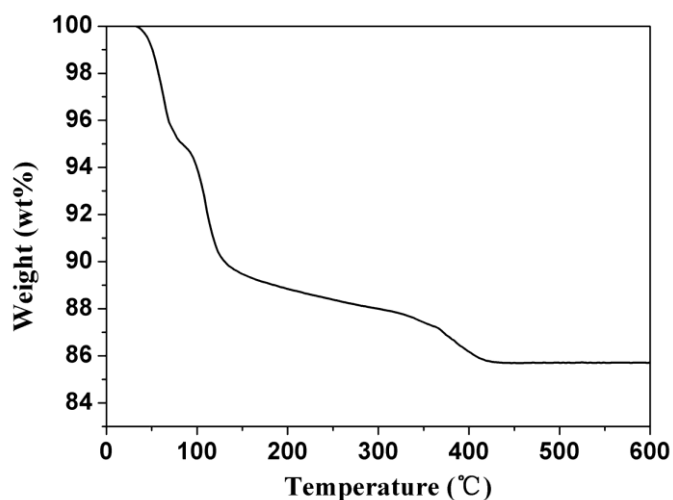

Figure S17. The TG curve of **1**.

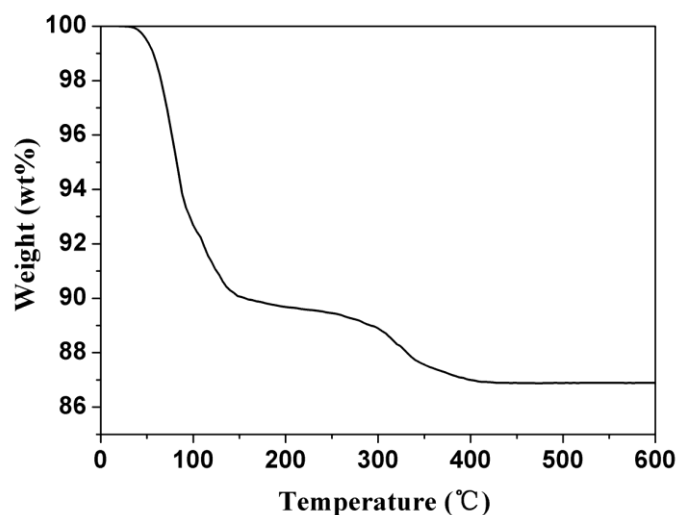

Figure S18. The TG curve of **2**.

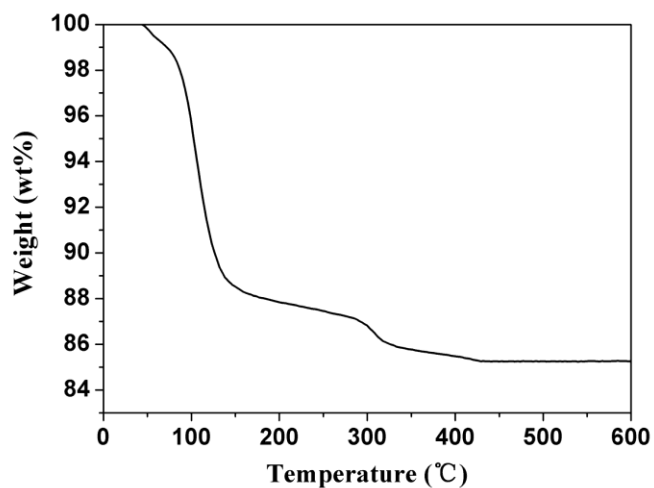

**Figure S19.** The TG curve of **3**.

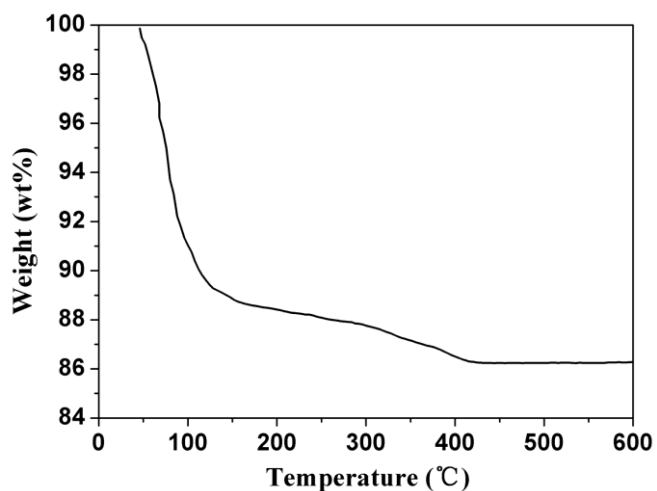

**Figure S20.** The TG curve of **4**.

Table S1. Selected bond lengths [Å] and bond angles (°) for the compound **1**.

|              |           |              |           |
|--------------|-----------|--------------|-----------|
| O(1)-W(4)    | 1.742(11) | O(21)-W(5)   | 1.752(11) |
| O(1)-Ca(1)   | 2.388(11) | O(22)-W(6)   | 1.876(12) |
| O(2)-W(4)    | 1.857(11) | O(22)-W(4)#2 | 2.234(12) |
| O(2)-W(2)    | 1.976(11) | O(22)-W(3)   | 2.315(11) |
| O(3)-W(4)    | 1.761(11) | OW1-Na(2)    | 2.414(14) |
| O(3)-Ca(1)#1 | 2.423(11) | OW1-Na(1)    | 2.434(14) |
| O(3)-Na(1)   | 2.482(13) | OW2-Na(1)    | 2.349(15) |
| O(4)-W(1)    | 1.788(11) | OW2-Na(2)    | 2.396(14) |
| O(4)-W(4)    | 2.217(11) | OW3-Na(1)#1  | 2.355(13) |
| O(5)-W(1)    | 1.936(10) | OW3-Ca(1)    | 2.400(12) |

---

|                    |           |                      |           |
|--------------------|-----------|----------------------|-----------|
| O(5)-W(5)#2        | 2.184(11) | OW4-Na(3)            | 2.353(14) |
| O(5)-W(3)#2        | 2.218(12) | OW4-Na(2)#4          | 2.385(16) |
| O(6)-W(1)          | 1.926(11) | OW5-Na(3)            | 2.462(19) |
| O(6)-W(6)          | 1.962(11) | OW5-Na(3)#5          | 2.546(17) |
| O(7)-W(2)          | 1.717(12) | OW6-Na(3)            | 2.648(16) |
| O(7)-Na(1)#1       | 2.425(14) | OW7-Na(3)            | 2.391(16) |
| O(8)-W(2)          | 1.850(12) | OW8-Ca(1)            | 2.394(13) |
| O(8)-W(1)#2        | 2.100(12) | OW9-Ca(1)            | 2.408(12) |
| O(9)-W(2)          | 1.900(11) | OW10-Na(1)           | 2.433(15) |
| O(9)-W(6)#2        | 2.031(11) | OW11-Na(2)           | 2.558(16) |
| O(10)-W(5)         | 1.856(12) | OW12-Na(2)           | 2.405(15) |
| O(10)-W(2)         | 1.934(11) | OW12-Na(3)#6         | 2.499(17) |
| O(11)-W(2)#2       | 2.225(11) | OW14-Ca(1)           | 2.394(13) |
| O(11)-W(6)         | 2.246(10) | Na(1)-OW3#1          | 2.355(13) |
| O(11)-W(1)         | 2.271(11) | Na(1)-O(7)#1         | 2.425(14) |
| O(12)-W(5)         | 1.723(12) | Na(2)-OW4#6          | 2.385(16) |
| O(13)-W(6)         | 1.769(11) | Na(3)-OW12#4         | 2.499(17) |
| O(13)-W(5)         | 2.232(10) | Na(3)-OW5#5          | 2.546(17) |
| O(14)-W(3)         | 1.903(11) | Ca(1)-O(3)#1         | 2.423(11) |
| O(14)-W(4)#2       | 1.966(10) | Ca(1)-O(19)#7        | 2.442(11) |
| O(15)-W(3)         | 1.721(12) | W(1)-O(8)#2          | 2.100(12) |
| O(16)-W(3)         | 1.712(12) | W(2)-O(11)#2         | 2.225(11) |
| O(17)-W(3)         | 1.916(11) | W(3)-O(5)#2          | 2.218(12) |
| O(17)-W(5)         | 1.959(12) | W(4)-O(14)#2         | 1.966(10) |
| O(19)-W(6)         | 1.745(11) | W(4)-O(22)#2         | 2.234(12) |
| O(19)-Ca(1)#3      | 2.442(11) | W(5)-O(5)#2          | 2.184(11) |
| O(20)-W(1)         | 1.709(12) | W(6)-O(9)#2          | 2.031(11) |
| O(20)-Na(2)        | 2.446(14) | W(4)-O(1)-Ca(1)      | 159.7(6)  |
| W(4)-O(2)-W(2)     | 148.0(7)  | W(1)-O(4)-W(4)       | 140.5(6)  |
| W(4)-O(3)-Ca(1)#1  | 132.2(6)  | W(1)-O(5)-W(5)#2     | 138.1(7)  |
| W(4)-O(3)-Na(1)    | 134.0(6)  | W(1)-O(5)-W(3)#2     | 124.9(6)  |
| Ca(1)#1-O(3)-Na(1) | 93.8(4)   | W(5)#2-O(5)-W(3)#2   | 95.9(4)   |
| W(1)-O(6)-W(6)     | 121.2(5)  | OW3#1-Na(1)-Ca(1)#1  | 41.6(3)   |
| W(2)-O(7)-Na(1)#1  | 132.2(5)  | O(7)#1-Na(1)-Ca(1)#1 | 108.1(3)  |
| W(2)-O(8)-W(1)#2   | 115.0(5)  | OW10-Na(1)-Ca(1)#1   | 121.8(4)  |
| W(2)-O(9)-W(6)#2   | 117.0(5)  | OW1-Na(1)-Ca(1)#1    | 65.6(3)   |
| W(5)-O(10)-W(2)    | 149.5(7)  | O(3)-Na(1)-Ca(1)#1   | 42.5(3)   |
| W(2)#2-O(11)-W(6)  | 97.1(4)   | Na(2)-Na(1)-Ca(1)#1  | 107.1(2)  |
| W(2)#2-O(11)-W(1)  | 95.8(4)   | OW4#6-Na(2)-OW2      | 158.3(6)  |
| W(6)-O(11)-W(1)    | 97.2(4)   | OW4#6-Na(2)-OW12     | 89.4(5)   |
| W(6)-O(13)-W(5)    | 138.4(6)  | OW2-Na(2)-OW12       | 94.9(5)   |
| W(3)-O(14)-W(4)#2  | 118.2(5)  | OW4#6-Na(2)-OW1      | 97.4(5)   |
| W(3)-O(17)-W(5)    | 115.0(5)  | OW2-Na(2)-OW1        | 85.2(5)   |
| W(6)-O(19)-Ca(1)#3 | 150.8(7)  | OW12-Na(2)-OW1       | 161.5(6)  |

---

---

|                      |          |                       |           |
|----------------------|----------|-----------------------|-----------|
| W(1)-O(20)-Na(2)     | 159.2(7) | OW4#6-Na(2)-O(20)     | 78.1(5)   |
| W(6)-O(22)-W(4)#2    | 136.9(6) | OW2-Na(2)-O(20)       | 80.4(5)   |
| W(6)-O(22)-W(3)      | 127.8(6) | OW12-Na(2)-O(20)      | 109.5(5)  |
| W(4)#2-O(22)-W(3)    | 93.7(4)  | OW1-Na(2)-O(20)       | 88.8(5)   |
| Na(2)-OW1-Na(1)      | 90.3(5)  | OW4#6-Na(2)-OW11      | 97.7(5)   |
| Na(1)-OW2-Na(2)      | 92.9(5)  | OW2-Na(2)-OW11        | 104.0(6)  |
| Na(1)#1-OW3-Ca(1)    | 97.7(5)  | OW12-Na(2)-OW11       | 79.3(5)   |
| Na(3)-OW4-Na(2)#4    | 93.4(5)  | OW1-Na(2)-OW11        | 82.8(5)   |
| Na(3)-OW5-Na(3)#5    | 89.6(6)  | O(20)-Na(2)-OW11      | 170.1(5)  |
| Na(2)-OW12-Na(3)#6   | 89.3(5)  | OW4#6-Na(2)-Na(1)     | 142.3(4)  |
| OW2-Na(1)-OW3#1      | 167.8(6) | OW2-Na(2)-Na(1)       | 43.0(4)   |
| OW2-Na(1)-O(7)#1     | 101.8(5) | OW12-Na(2)-Na(1)      | 127.2(5)  |
| OW3#1-Na(1)-O(7)#1   | 90.4(5)  | OW1-Na(2)-Na(1)       | 45.1(3)   |
| OW2-Na(1)-OW10       | 95.9(5)  | O(20)-Na(2)-Na(1)     | 95.1(4)   |
| OW3#1-Na(1)-OW10     | 85.4(5)  | OW11-Na(2)-Na(1)      | 82.7(4)   |
| O(7)#1-Na(1)-OW10    | 90.1(5)  | OW4#6-Na(2)-Na(3)#6   | 43.0(3)   |
| OW2-Na(1)-OW1        | 85.8(5)  | OW2-Na(2)-Na(3)#6     | 136.2(4)  |
| OW3#1-Na(1)-OW1      | 82.1(5)  | OW12-Na(2)-Na(3)#6    | 46.5(4)   |
| O(7)#1-Na(1)-OW1     | 172.4(5) | OW1-Na(2)-Na(3)#6     | 138.3(4)  |
| OW10-Na(1)-OW1       | 90.0(5)  | O(20)-Na(2)-Na(3)#6   | 93.0(4)   |
| OW2-Na(1)-O(3)       | 95.8(5)  | OW11-Na(2)-Na(3)#6    | 89.8(4)   |
| OW3#1-Na(1)-O(3)     | 80.9(4)  | Na(1)-Na(2)-Na(3)#6   | 171.4(3)  |
| O(7)#1-Na(1)-O(3)    | 98.2(4)  | OW4-Na(3)-OW7         | 167.8(6)  |
| OW10-Na(1)-O(3)      | 164.0(5) | OW4-Na(3)-OW5         | 83.8(6)   |
| OW1-Na(1)-O(3)       | 80.0(4)  | OW7-Na(3)-OW5         | 103.4(6)  |
| OW2-Na(1)-Na(2)      | 44.1(3)  | OW4-Na(3)-OW12#4      | 87.9(5)   |
| OW3#1-Na(1)-Na(2)    | 124.6(4) | OW7-Na(3)-OW12#4      | 82.8(5)   |
| O(7)#1-Na(1)-Na(2)   | 142.8(4) | OW5-Na(3)-OW12#4      | 165.0(6)  |
| OW10-Na(1)-Na(2)     | 81.4(4)  | OW4-Na(3)-OW5#5       | 78.4(5)   |
| OW1-Na(1)-Na(2)      | 44.6(3)  | OW7-Na(3)-OW5#5       | 111.0(5)  |
| O(3)-Na(1)-Na(2)     | 99.6(4)  | OW5-Na(3)-OW5#5       | 90.4(6)   |
| OW2-Na(1)-Ca(1)#1    | 130.7(4) | OW12#4-Na(3)-OW5#5    | 100.2(6)  |
| OW4-Na(3)-OW6        | 81.8(5)  | O(3)#1-Ca(1)-Na(1)#1  | 43.7(3)   |
| OW7-Na(3)-OW6        | 89.0(5)  | O(19)#7-Ca(1)-Na(1)#1 | 97.6(3)   |
| OW5-Na(3)-OW6        | 84.6(6)  | O(1)-Ca(1)-W(4)#1     | 70.9(3)   |
| OW12#4-Na(3)-OW6     | 81.8(5)  | OW14-Ca(1)-W(4)#1     | 68.7(3)   |
| OW5#5-Na(3)-OW6      | 160.0(5) | OW8-Ca(1)-W(4)#1      | 98.1(4)   |
| OW4-Na(3)-Na(2)#4    | 43.7(4)  | OW3-Ca(1)-W(4)#1      | 100.3(3)  |
| OW7-Na(3)-Na(2)#4    | 126.3(5) | OW9-Ca(1)-W(4)#1      | 152.2(3)  |
| OW5-Na(3)-Na(2)#4    | 125.9(5) | O(3)#1-Ca(1)-W(4)#1   | 19.9(3)   |
| OW12#4-Na(3)-Na(2)#4 | 44.2(4)  | O(19)#7-Ca(1)-W(4)#1  | 132.6(3)  |
| OW5#5-Na(3)-Na(2)#4  | 90.4(4)  | Na(1)#1-Ca(1)-W(4)#1  | 63.63(13) |
| OW6-Na(3)-Na(2)#4    | 77.1(4)  | O(20)-W(1)-O(4)       | 103.1(6)  |
| OW4-Na(3)-Na(3)#5    | 77.3(4)  | O(20)-W(1)-O(6)       | 100.8(5)  |

---

---

|                       |          |                      |          |
|-----------------------|----------|----------------------|----------|
| OW7-Na(3)-Na(3)#5     | 114.8(5) | O(4)-W(1)-O(6)       | 92.4(5)  |
| OW5-Na(3)-Na(3)#5     | 46.2(4)  | O(20)-W(1)-O(5)      | 100.9(5) |
| OW12#4-Na(3)-Na(3)#5  | 143.3(6) | O(4)-W(1)-O(5)       | 93.9(5)  |
| OW5#5-Na(3)-Na(3)#5   | 44.2(4)  | O(6)-W(1)-O(5)       | 155.3(5) |
| OW6-Na(3)-Na(3)#5     | 127.7(5) | O(20)-W(1)-O(8)#2    | 95.8(5)  |
| Na(2)#4-Na(3)-Na(3)#5 | 114.5(4) | O(4)-W(1)-O(8)#2     | 161.0(5) |
| O(1)-Ca(1)-OW14       | 131.7(4) | O(6)-W(1)-O(8)#2     | 83.0(5)  |
| O(1)-Ca(1)-OW8        | 83.1(4)  | O(5)-W(1)-O(8)#2     | 83.3(5)  |
| OW14-Ca(1)-OW8        | 77.6(5)  | O(20)-W(1)-O(11)     | 165.1(5) |
| O(1)-Ca(1)-OW3        | 90.4(4)  | O(4)-W(1)-O(11)      | 89.4(4)  |
| OW14-Ca(1)-OW3        | 121.7(4) | O(6)-W(1)-O(11)      | 70.2(4)  |
| OW8-Ca(1)-OW3         | 157.2(5) | O(5)-W(1)-O(11)      | 86.0(4)  |
| O(1)-Ca(1)-OW9        | 81.3(4)  | O(8)#2-W(1)-O(11)    | 71.8(4)  |
| OW14-Ca(1)-OW9        | 135.9(4) | O(7)-W(2)-O(8)       | 103.8(5) |
| OW8-Ca(1)-OW9         | 79.5(5)  | O(7)-W(2)-O(9)       | 103.7(5) |
| OW3-Ca(1)-OW9         | 77.9(4)  | O(8)-W(2)-O(9)       | 91.8(5)  |
| O(1)-Ca(1)-O(3)#1     | 76.5(4)  | O(7)-W(2)-O(10)      | 101.7(5) |
| OW14-Ca(1)-O(3)#1     | 74.6(4)  | O(8)-W(2)-O(10)      | 86.7(5)  |
| OW8-Ca(1)-O(3)#1      | 118.0(4) | O(9)-W(2)-O(10)      | 154.1(5) |
| OW3-Ca(1)-O(3)#1      | 81.2(4)  | O(7)-W(2)-O(2)       | 99.2(5)  |
| OW9-Ca(1)-O(3)#1      | 149.3(5) | O(8)-W(2)-O(2)       | 156.7(5) |
| O(1)-Ca(1)-O(19)#7    | 156.5(4) | O(9)-W(2)-O(2)       | 86.2(4)  |
| OW14-Ca(1)-O(19)#7    | 68.5(4)  | O(10)-W(2)-O(2)      | 85.1(4)  |
| OW8-Ca(1)-O(19)#7     | 91.8(4)  | O(7)-W(2)-O(11)#2    | 177.8(4) |
| OW3-Ca(1)-O(19)#7     | 85.4(4)  | O(8)-W(2)-O(11)#2    | 77.4(4)  |
| OW9-Ca(1)-O(19)#7     | 75.2(4)  | O(9)-W(2)-O(11)#2    | 74.3(4)  |
| O(3)#1-Ca(1)-O(19)#7  | 125.4(4) | O(10)-W(2)-O(11)#2   | 80.1(4)  |
| O(1)-Ca(1)-Na(1)#1    | 94.2(3)  | O(2)-W(2)-O(11)#2    | 79.7(5)  |
| OW14-Ca(1)-Na(1)#1    | 90.8(4)  | O(16)-W(3)-O(15)     | 101.8(6) |
| OW8-Ca(1)-Na(1)#1     | 161.2(4) | O(16)-W(3)-O(14)     | 97.8(5)  |
| OW3-Ca(1)-Na(1)#1     | 40.7(3)  | O(15)-W(3)-O(14)     | 99.1(5)  |
| OW9-Ca(1)-Na(1)#1     | 118.5(3) | O(16)-W(3)-O(17)     | 95.6(5)  |
| O(10)-W(5)-O(13)      | 83.6(4)  | O(3)-W(4)-O(2)       | 99.0(5)  |
| O(17)-W(5)-O(13)      | 78.7(4)  | O(1)-W(4)-O(14)#2    | 94.9(5)  |
| O(5)#2-W(5)-O(13)     | 76.9(4)  | O(3)-W(4)-O(14)#2    | 94.7(5)  |
| O(19)-W(6)-O(13)      | 102.7(5) | O(2)-W(4)-O(14)#2    | 156.7(5) |
| O(19)-W(6)-O(22)      | 103.2(5) | O(1)-W(4)-O(4)       | 164.8(5) |
| O(13)-W(6)-O(22)      | 94.9(5)  | O(3)-W(4)-O(4)       | 90.6(5)  |
| O(19)-W(6)-O(6)       | 96.4(5)  | O(2)-W(4)-O(4)       | 84.2(5)  |
| O(13)-W(6)-O(6)       | 92.4(5)  | O(14)#2-W(4)-O(4)    | 77.0(4)  |
| O(22)-W(6)-O(6)       | 157.0(5) | O(1)-W(4)-O(22)#2    | 89.8(5)  |
| O(19)-W(6)-O(9)#2     | 94.8(5)  | O(3)-W(4)-O(22)#2    | 163.7(5) |
| O(13)-W(6)-O(9)#2     | 162.0(4) | O(2)-W(4)-O(22)#2    | 88.5(5)  |
| O(22)-W(6)-O(9)#2     | 84.9(5)  | O(14)#2-W(4)-O(22)#2 | 73.8(4)  |

---

|                   |          |                      |          |
|-------------------|----------|----------------------|----------|
| O(6)-W(6)-O(9)#2  | 81.6(5)  | O(4)-W(4)-O(22)#2    | 75.7(4)  |
| O(19)-W(6)-O(11)  | 161.7(4) | O(1)-W(4)-Ca(1)#1    | 109.0(4) |
| O(13)-W(6)-O(11)  | 90.5(4)  | O(3)-W(4)-Ca(1)#1    | 27.9(3)  |
| O(22)-W(6)-O(11)  | 88.0(4)  | O(2)-W(4)-Ca(1)#1    | 71.2(4)  |
| O(6)-W(6)-O(11)   | 70.1(4)  | O(14)#2-W(4)-Ca(1)#1 | 120.3(3) |
| O(9)#2-W(6)-O(11) | 71.5(4)  | O(4)-W(4)-Ca(1)#1    | 86.2(3)  |
| O(15)-W(3)-O(17)  | 101.8(5) | O(22)#2-W(4)-Ca(1)#1 | 154.2(3) |
| O(14)-W(3)-O(17)  | 152.3(5) | O(12)-W(5)-O(21)     | 102.9(6) |
| O(16)-W(3)-O(5)#2 | 163.6(5) | O(12)-W(5)-O(10)     | 98.6(5)  |
| O(15)-W(3)-O(5)#2 | 92.6(5)  | O(21)-W(5)-O(10)     | 99.3(5)  |
| O(14)-W(3)-O(5)#2 | 87.4(4)  | O(12)-W(5)-O(17)     | 96.3(5)  |
| O(17)-W(3)-O(5)#2 | 73.7(4)  | O(21)-W(5)-O(17)     | 95.0(5)  |
| O(16)-W(3)-O(22)  | 89.4(5)  | O(10)-W(5)-O(17)     | 156.5(5) |
| O(15)-W(3)-O(22)  | 167.3(5) | O(12)-W(5)-O(5)#2    | 93.1(5)  |
| O(14)-W(3)-O(22)  | 73.1(4)  | O(21)-W(5)-O(5)#2    | 161.5(5) |
| O(17)-W(3)-O(22)  | 82.9(4)  | O(10)-W(5)-O(5)#2    | 87.4(5)  |
| O(5)#2-W(3)-O(22) | 77.2(4)  | O(17)-W(5)-O(5)#2    | 73.7(4)  |
| O(1)-W(4)-O(3)    | 102.9(5) | O(12)-W(5)-O(13)     | 169.6(5) |
| O(1)-W(4)-O(2)    | 100.1(5) | O(21)-W(5)-O(13)     | 86.7(5)  |

Symmetry code for 1: #1 -x+2, -y+1, -z; #2 -x+2, -y, -z; #3 x+1/2, -y+1/2, z+1/2; #4 x+1/2, -y+1/2, z-1/2; #5 -x+3, -y+1, -z; #6 x-1/2, -y+1/2, z+1/2; #7 x-1/2, -y+1/2, z-1/2.

Table S2. Selected bond lengths [Å] and bond angles (°) for the compound 2.

|              |           |               |           |
|--------------|-----------|---------------|-----------|
| W(1)-O(21)   | 1.735(9)  | W(6)-O(9)     | 1.682(12) |
| W(1)-O(18)   | 1.791(8)  | W(6)-O(15)    | 1.773(9)  |
| W(1)-O(1)    | 1.927(10) | W(6)-O(7)     | 1.902(9)  |
| W(1)-O(10)   | 1.954(9)  | W(6)-O(10)    | 1.941(8)  |
| W(1)-O(3)    | 2.105(9)  | W(6)-O(11)    | 2.080(9)  |
| W(1)-O(6)    | 2.236(8)  | W(6)-O(6)     | 2.242(9)  |
| W(2)-O(19)   | 1.709(12) | Sr(1)-O(17)   | 2.518(11) |
| W(2)-O(5)    | 1.745(9)  | Sr(1)-O(2W)   | 2.567(13) |
| W(2)-O(16)   | 1.871(10) | Sr(1)-O(12)#2 | 2.569(10) |
| W(2)-O(8)    | 1.952(10) | Sr(1)-O(9)#3  | 2.573(12) |
| W(2)-O(15)#1 | 2.181(8)  | Sr(1)-O(5W)   | 2.579(12) |
| W(2)-O(1)    | 2.230(10) | Sr(1)-O(4W)   | 2.620(12) |
| W(3)-O(20)   | 1.734(10) | Sr(1)-O(1W)   | 2.647(13) |
| W(3)-O(3)    | 1.858(9)  | Sr(1)-O(3W)   | 2.728(12) |
| W(3)-O(11)   | 1.867(10) | Sr(2)-O(20)#4 | 2.568(10) |
| W(3)-O(14)#1 | 1.941(9)  | Sr(2)-O(6W)   | 2.568(12) |

---

|                    |           |                    |           |
|--------------------|-----------|--------------------|-----------|
| W(3)-O(16)         | 1.960(11) | Sr(2)-O(7W)        | 2.576(14) |
| W(3)-O(6)          | 2.276(8)  | Sr(2)-O(8W)        | 2.598(14) |
| W(4)-O(13)         | 1.716(10) | Sr(2)-O(5)         | 2.605(10) |
| W(4)-O(4)          | 1.723(10) | Sr(2)-O(10W)       | 2.630(11) |
| W(4)-O(2)          | 1.877(10) | Sr(2)-O(13)        | 2.641(11) |
| W(4)-O(8)          | 1.917(10) | Sr(2)-O(9W)        | 2.668(15) |
| W(4)-O(1)          | 2.259(10) | O(7)-W(5)#1        | 2.197(10) |
| W(4)-O(7)#1        | 2.283(8)  | O(7)-W(4)#1        | 2.283(8)  |
| W(5)-O(12)         | 1.718(11) | O(9)-Sr(1)#5       | 2.573(12) |
| W(5)-O(17)         | 1.747(10) | O(12)-Sr(1)#2      | 2.569(10) |
| W(5)-O(14)         | 1.888(9)  | O(14)-W(3)#1       | 1.941(9)  |
| W(5)-O(2)          | 2.017(8)  | O(15)-W(2)#1       | 2.181(8)  |
| W(5)-O(7)#1        | 2.197(10) | O(20)-Sr(2)#6      | 2.568(10) |
| W(5)-O(18)         | 2.226(9)  | O(21)-W(1)-O(18)   | 102.1(4)  |
| O(21)-W(1)-O(1)    | 101.7(5)  | O(10)-W(1)-O(6)    | 70.5(3)   |
| O(18)-W(1)-O(1)    | 96.2(4)   | O(3)-W(1)-O(6)     | 72.8(3)   |
| O(21)-W(1)-O(10)   | 98.7(5)   | O(19)-W(2)-O(5)    | 102.4(5)  |
| O(18)-W(1)-O(10)   | 91.4(4)   | O(19)-W(2)-O(16)   | 98.8(5)   |
| O(1)-W(1)-O(10)    | 156.1(4)  | O(5)-W(2)-O(16)    | 97.6(4)   |
| O(21)-W(1)-O(3)    | 95.2(4)   | O(19)-W(2)-O(8)    | 97.3(5)   |
| O(18)-W(1)-O(3)    | 162.4(4)  | O(5)-W(2)-O(8)     | 94.6(4)   |
| O(1)-W(1)-O(3)     | 83.4(4)   | O(16)-W(2)-O(8)    | 157.2(4)  |
| O(10)-W(1)-O(3)    | 82.6(4)   | O(19)-W(2)-O(15)#1 | 90.6(4)   |
| O(21)-W(1)-O(6)    | 164.5(4)  | O(5)-W(2)-O(15)#1  | 165.8(4)  |
| O(18)-W(1)-O(6)    | 89.6(3)   | O(16)-W(2)-O(15)#1 | 86.1(4)   |
| O(1)-W(1)-O(6)     | 86.9(3)   | O(8)-W(2)-O(15)#1  | 77.8(3)   |
| O(19)-W(2)-O(1)    | 166.2(4)  | O(2)-W(5)-O(7)#1   | 73.0(3)   |
| O(5)-W(2)-O(1)     | 88.9(4)   | O(12)-W(5)-O(18)   | 166.1(4)  |
| O(16)-W(2)-O(1)    | 87.4(4)   | O(17)-W(5)-O(18)   | 88.9(4)   |
| O(8)-W(2)-O(1)     | 73.6(4)   | O(14)-W(5)-O(18)   | 84.9(4)   |
| O(15)#1-W(2)-O(1)  | 77.5(3)   | O(2)-W(5)-O(18)    | 78.2(3)   |
| O(20)-W(3)-O(3)    | 100.1(4)  | O(7)#1-W(5)-O(18)  | 77.0(3)   |
| O(20)-W(3)-O(11)   | 104.3(4)  | O(9)-W(6)-O(15)    | 104.2(5)  |
| O(3)-W(3)-O(11)    | 93.2(4)   | O(9)-W(6)-O(7)     | 101.8(4)  |
| O(20)-W(3)-O(14)#1 | 102.0(4)  | O(15)-W(6)-O(7)    | 94.9(4)   |
| O(3)-W(3)-O(14)#1  | 157.0(4)  | O(9)-W(6)-O(10)    | 97.9(4)   |
| O(11)-W(3)-O(14)#1 | 87.6(4)   | O(15)-W(6)-O(10)   | 93.0(4)   |
| O(20)-W(3)-O(16)   | 99.0(5)   | O(7)-W(6)-O(10)    | 156.3(4)  |
| O(3)-W(3)-O(16)    | 86.1(4)   | O(9)-W(6)-O(11)    | 93.0(4)   |
| O(11)-W(3)-O(16)   | 156.5(4)  | O(15)-W(6)-O(11)   | 162.7(5)  |
| O(14)#1-W(3)-O(16) | 84.2(4)   | O(7)-W(6)-O(11)    | 83.2(4)   |
| O(20)-W(3)-O(6)    | 176.5(4)  | O(10)-W(6)-O(11)   | 82.7(3)   |
| O(3)-W(3)-O(6)     | 76.4(3)   | O(9)-W(6)-O(6)     | 162.7(3)  |
| O(11)-W(3)-O(6)    | 76.2(4)   | O(15)-W(6)-O(6)    | 89.7(4)   |

---



---

|                      |          |                      |          |
|----------------------|----------|----------------------|----------|
| O(14)#1-W(3)-O(6)    | 81.5(3)  | O(7)-W(6)-O(6)       | 87.1(4)  |
| O(16)-W(3)-O(6)      | 80.8(3)  | O(10)-W(6)-O(6)      | 70.6(3)  |
| O(13)-W(4)-O(4)      | 102.6(5) | O(11)-W(6)-O(6)      | 73.1(4)  |
| O(13)-W(4)-O(2)      | 96.7(5)  | O(17)-Sr(1)-O(2W)    | 145.8(3) |
| O(4)-W(4)-O(2)       | 100.3(5) | O(17)-Sr(1)-O(12)#2  | 75.4(3)  |
| O(13)-W(4)-O(8)      | 100.8(4) | O(2W)-Sr(1)-O(12)#2  | 75.5(4)  |
| O(4)-W(4)-O(8)       | 96.6(4)  | O(17)-Sr(1)-O(9)#3   | 141.2(3) |
| O(2)-W(4)-O(8)       | 152.4(4) | O(2W)-Sr(1)-O(9)#3   | 68.9(3)  |
| O(13)-W(4)-O(1)      | 88.1(4)  | O(12)#2-Sr(1)-O(9)#3 | 143.3(3) |
| O(4)-W(4)-O(1)       | 166.8(4) | O(17)-Sr(1)-O(5W)    | 112.0(6) |
| O(2)-W(4)-O(1)       | 85.9(4)  | O(2W)-Sr(1)-O(5W)    | 81.0(7)  |
| O(8)-W(4)-O(1)       | 73.5(4)  | O(12)#2-Sr(1)-O(5W)  | 82.0(4)  |
| O(13)-W(4)-O(7)#1    | 162.7(5) | O(9)#3-Sr(1)-O(5W)   | 83.9(5)  |
| O(4)-W(4)-O(7)#1     | 93.3(4)  | O(17)-Sr(1)-O(4W)    | 83.2(4)  |
| O(2)-W(4)-O(7)#1     | 73.5(4)  | O(2W)-Sr(1)-O(4W)    | 73.7(5)  |
| O(8)-W(4)-O(7)#1     | 83.9(3)  | O(12)#2-Sr(1)-O(4W)  | 78.3(4)  |
| O(1)-W(4)-O(7)#1     | 77.2(3)  | O(9)#3-Sr(1)-O(4W)   | 99.5(4)  |
| O(12)-W(5)-O(17)     | 103.7(5) | O(5W)-Sr(1)-O(4W)    | 151.1(6) |
| O(12)-W(5)-O(14)     | 98.4(4)  | O(17)-Sr(1)-O(1W)    | 75.7(4)  |
| O(17)-W(5)-O(14)     | 100.5(4) | O(2W)-Sr(1)-O(1W)    | 118.2(5) |
| O(12)-W(5)-O(2)      | 94.8(4)  | O(12)#2-Sr(1)-O(1W)  | 139.8(4) |
| O(17)-W(5)-O(2)      | 93.7(4)  | O(9)#3-Sr(1)-O(1W)   | 68.9(4)  |
| O(14)-W(5)-O(2)      | 157.6(4) | O(5W)-Sr(1)-O(1W)    | 135.1(5) |
| O(12)-W(5)-O(7)#1    | 89.5(4)  | O(4W)-Sr(1)-O(1W)    | 71.1(4)  |
| O(17)-W(5)-O(7)#1    | 162.2(3) | O(17)-Sr(1)-O(3W)    | 81.7(4)  |
| O(14)-W(5)-O(7)#1    | 89.1(4)  | O(2W)-Sr(1)-O(3W)    | 132.2(5) |
| O(12)#2-Sr(1)-O(3W)  | 135.2(4) | O(8W)-Sr(2)-O(9W)    | 85.0(5)  |
| O(9)#3-Sr(1)-O(3W)   | 69.8(4)  | O(5)-Sr(2)-O(9W)     | 126.6(3) |
| O(5W)-Sr(1)-O(3W)    | 71.7(6)  | O(10W)-Sr(2)-O(9W)   | 72.6(4)  |
| O(4W)-Sr(1)-O(3W)    | 136.5(5) | O(13)-Sr(2)-O(9W)    | 72.8(4)  |
| O(1W)-Sr(1)-O(3W)    | 65.7(5)  | W(1)-O(1)-W(2)       | 137.2(5) |
| O(20)#4-Sr(2)-O(6W)  | 101.7(4) | W(1)-O(1)-W(4)       | 126.1(4) |
| O(20)#4-Sr(2)-O(7W)  | 68.9(4)  | W(2)-O(1)-W(4)       | 94.5(4)  |
| O(6W)-Sr(2)-O(7W)    | 73.1(5)  | W(4)-O(2)-W(5)       | 116.7(4) |
| O(20)#4-Sr(2)-O(8W)  | 137.4(4) | W(3)-O(3)-W(1)       | 115.1(4) |
| O(6W)-Sr(2)-O(8W)    | 74.4(4)  | W(2)-O(5)-Sr(2)      | 139.1(6) |
| O(7W)-Sr(2)-O(8W)    | 142.1(5) | W(1)-O(6)-W(6)       | 97.7(3)  |
| O(20)#4-Sr(2)-O(5)   | 147.7(3) | W(1)-O(6)-W(3)       | 95.8(3)  |
| O(6W)-Sr(2)-O(5)     | 76.1(3)  | W(6)-O(6)-W(3)       | 95.3(3)  |
| O(7W)-Sr(2)-O(5)     | 79.8(4)  | W(6)-O(7)-W(5)#1     | 138.3(5) |
| O(8W)-Sr(2)-O(5)     | 73.9(4)  | W(6)-O(7)-W(4)#1     | 125.4(5) |
| O(20)#4-Sr(2)-O(10W) | 71.3(4)  | W(5)#1-O(7)-W(4)#1   | 95.5(3)  |
| O(6W)-Sr(2)-O(10W)   | 72.0(4)  | W(4)-O(8)-W(2)       | 116.9(5) |
| O(7W)-Sr(2)-O(10W)   | 119.0(5) | W(6)-O(9)-Sr(1)#5    | 155.5(5) |

---

|                     |          |                    |          |
|---------------------|----------|--------------------|----------|
| O(8W)-Sr(2)-O(10W)  | 67.2(4)  | W(6)-O(10)-W(1)    | 120.0(4) |
| O(5)-Sr(2)-O(10W)   | 134.7(4) | W(3)-O(11)-W(6)    | 115.4(5) |
| O(20)#4-Sr(2)-O(13) | 89.3(3)  | W(5)-O(12)-Sr(1)#2 | 161.8(5) |
| O(6W)-Sr(2)-O(13)   | 143.4(4) | W(4)-O(13)-Sr(2)   | 137.8(5) |
| O(7W)-Sr(2)-O(13)   | 78.8(4)  | W(5)-O(14)-W(3)#1  | 145.5(6) |
| O(8W)-Sr(2)-O(13)   | 119.5(3) | W(6)-O(15)-W(2)#1  | 139.1(5) |
| O(5)-Sr(2)-O(13)    | 76.3(3)  | W(2)-O(16)-W(3)    | 149.1(6) |
| O(10W)-Sr(2)-O(13)  | 143.9(4) | W(5)-O(17)-Sr(1)   | 147.7(4) |
| O(20)#4-Sr(2)-O(9W) | 73.8(4)  | W(1)-O(18)-W(5)    | 139.1(5) |
| O(6W)-Sr(2)-O(9W)   | 143.8(4) | W(3)-O(20)-Sr(2)#6 | 165.3(6) |
| O(7W)-Sr(2)-O(9W)   | 132.8(5) |                    |          |

Symmetry code for **2**: #1 -x+1, -y, -z; #2 -x+1, -y+1, -z; #3 -x+1/2, y+1/2, -z-1/2; #4 -x+1/2, y+1/2, -z+1/2; #5 -x+1/2, y-1/2, -z-1/2; #6 -x+1/2, y-1/2, -z+1/2.

Table S3. Selected bond lengths [Å] and bond angles (°) for the compound **3**.

|               |           |               |           |
|---------------|-----------|---------------|-----------|
| O(1)-W(1)     | 1.813(10) | O(11)-W(5)    | 1.863(11) |
| O(1)-W(6)     | 2.156(10) | O(11)-W(2)    | 2.098(11) |
| O(2)-W(4)     | 1.757(13) | O(10W)-Sr(2)  | 2.725(14) |
| O(2)-Na(1)    | 2.442(15) | O(10W)-Sr(1)  | 2.803(14) |
| O(1W)-Na(1)#1 | 2.433(15) | O(12)-W(4)    | 1.717(11) |
| O(1W)-Sr(1)   | 2.709(13) | O(13)-W(6)    | 1.882(11) |
| O(3)-W(2)     | 1.796(11) | O(13)-W(5)    | 1.960(11) |
| O(3)-W(3)     | 2.209(11) | O(14)-W(3)    | 1.915(10) |
| O(2W)-Na(1)#1 | 2.478(17) | O(14)-W(5)#3  | 1.933(10) |
| O(2W)-Sr(1)   | 2.631(13) | O(15)-W(6)    | 1.740(12) |
| O(4)-W(1)     | 1.899(11) | O(15)-Na(1)   | 2.388(13) |
| O(4)-W(3)     | 2.209(12) | O(16)-W(5)    | 1.858(10) |
| O(4)-W(4)     | 2.279(10) | O(16)-W(1)#3  | 2.067(10) |
| O(3W)-Sr(1)   | 2.671(16) | O(17)-W(2)    | 1.730(12) |
| O(5)-W(3)     | 1.730(12) | O(17)-Na(1)#1 | 2.266(14) |
| O(5)-Sr(2)#2  | 2.551(13) | O(18)-W(2)    | 1.932(11) |
| O(4W)-Sr(1)   | 2.594(14) | O(18)-W(1)#3  | 1.960(10) |
| O(6)-W(5)     | 2.232(12) | O(19)-W(3)    | 1.726(12) |
| O(6)-W(1)#3   | 2.249(12) | O(19)-Sr(1)   | 2.610(12) |
| O(6)-W(2)     | 2.284(11) | O(20)-W(5)    | 1.731(11) |
| O(5W)-Sr(1)   | 2.599(12) | O(21)-W(2)    | 1.919(11) |
| O(5W)-Sr(2)   | 2.600(13) | O(21)-W(6)    | 2.241(11) |
| O(7)-W(1)     | 1.748(12) | O(21)-W(4)    | 2.292(11) |
| O(7)-Sr(2)#4  | 2.484(13) | O(21)-Na(1)   | 2.773(13) |
| O(6W)-Sr(1)   | 2.674(14) | Sr(1)-O(9)#5  | 2.701(13) |

|                     |           |                      |           |
|---------------------|-----------|----------------------|-----------|
| O(6W)-Sr(2)         | 2.735(13) | Sr(2)-O(7)#5         | 2.484(13) |
| O(8)-W(4)           | 1.886(12) | Sr(2)-O(5)#6         | 2.551(13) |
| O(8)-W(6)           | 1.982(11) | W(1)-O(18)#3         | 1.960(10) |
| O(7W)-Sr(2)         | 2.719(18) | W(1)-O(16)#3         | 2.067(10) |
| O(9)-W(6)           | 1.729(13) | W(1)-O(6)#3          | 2.249(12) |
| O(9)-Sr(1)#4        | 2.701(13) | W(5)-O(14)#3         | 1.933(10) |
| O(8W)-Sr(2)         | 2.650(17) | Na(1)-O(17)#1        | 2.266(14) |
| O(10)-W(4)          | 1.918(12) | Na(1)-O(1W)#1        | 2.433(15) |
| O(10)-W(3)          | 1.958(11) | Na(1)-O(2W)#1        | 2.478(17) |
| O(9W)-Sr(2)         | 2.560(16) | W(1)-O(1)-W(6)       | 138.2(6)  |
| W(4)-O(2)-Na(1)     | 115.7(7)  | W(3)-O(5)-Sr(2)#2    | 151.2(6)  |
| Na(1)#1-O(1W)-Sr(1) | 101.0(5)  | W(5)-O(6)-W(1)#3     | 96.1(5)   |
| W(2)-O(3)-W(3)      | 139.3(6)  | W(5)-O(6)-W(2)       | 95.6(4)   |
| Na(1)#1-O(2W)-Sr(1) | 102.1(5)  | W(1)#3-O(6)-W(2)     | 96.4(5)   |
| W(1)-O(4)-W(3)      | 138.2(6)  | Sr(1)-O(5W)-Sr(2)    | 103.0(4)  |
| W(1)-O(4)-W(4)      | 126.0(6)  | W(1)-O(7)-Sr(2)#4    | 152.5(7)  |
| W(3)-O(4)-W(4)      | 94.9(4)   | Sr(1)-O(6W)-Sr(2)    | 97.6(4)   |
| W(4)-O(8)-W(6)      | 117.9(5)  | O(6W)-Sr(1)-O(1W)    | 137.0(4)  |
| W(6)-O(9)-Sr(1)#4   | 149.0(6)  | O(9)#5-Sr(1)-O(1W)   | 66.4(4)   |
| W(4)-O(10)-W(3)     | 117.1(6)  | O(4W)-Sr(1)-O(10W)   | 135.4(4)  |
| W(5)-O(11)-W(2)     | 115.2(5)  | O(5W)-Sr(1)-O(10W)   | 67.8(4)   |
| Sr(2)-O(10W)-Sr(1)  | 94.8(4)   | O(19)-Sr(1)-O(10W)   | 67.0(4)   |
| W(6)-O(13)-W(5)     | 146.6(7)  | O(2W)-Sr(1)-O(10W)   | 109.8(4)  |
| W(3)-O(14)-W(5)#3   | 146.3(6)  | O(3W)-Sr(1)-O(10W)   | 69.6(4)   |
| W(6)-O(15)-Na(1)    | 117.2(6)  | O(6W)-Sr(1)-O(10W)   | 65.4(4)   |
| W(5)-O(16)-W(1)#3   | 116.2(5)  | O(9)#5-Sr(1)-O(10W)  | 124.7(4)  |
| W(2)-O(17)-Na(1)#1  | 153.9(7)  | O(1W)-Sr(1)-O(10W)   | 136.5(4)  |
| W(2)-O(18)-W(1)#3   | 120.5(6)  | O(4W)-Sr(1)-Na(1)#1  | 68.3(4)   |
| W(3)-O(19)-Sr(1)    | 153.2(6)  | O(5W)-Sr(1)-Na(1)#1  | 120.1(3)  |
| W(2)-O(21)-W(6)     | 138.7(5)  | O(19)-Sr(1)-Na(1)#1  | 80.7(3)   |
| W(2)-O(21)-W(4)     | 124.9(5)  | O(2W)-Sr(1)-Na(1)#1  | 37.6(3)   |
| W(6)-O(21)-W(4)     | 94.0(4)   | O(3W)-Sr(1)-Na(1)#1  | 103.4(3)  |
| W(2)-O(21)-Na(1)    | 103.2(5)  | O(6W)-Sr(1)-Na(1)#1  | 151.2(3)  |
| W(6)-O(21)-Na(1)    | 89.1(4)   | O(9)#5-Sr(1)-Na(1)#1 | 88.9(3)   |
| W(4)-O(21)-Na(1)    | 89.2(4)   | O(1W)-Sr(1)-Na(1)#1  | 36.9(3)   |
| O(4W)-Sr(1)-O(5W)   | 135.1(5)  | O(10W)-Sr(1)-Na(1)#1 | 142.2(3)  |
| O(4W)-Sr(1)-O(19)   | 146.9(5)  | O(4W)-Sr(1)-Sr(2)    | 125.8(4)  |
| O(5W)-Sr(1)-O(19)   | 70.6(4)   | O(5W)-Sr(1)-Sr(2)    | 38.5(3)   |
| O(4W)-Sr(1)-O(2W)   | 77.5(5)   | O(19)-Sr(1)-Sr(2)    | 87.3(3)   |
| O(5W)-Sr(1)-O(2W)   | 138.4(4)  | O(2W)-Sr(1)-Sr(2)    | 150.8(3)  |
| O(19)-Sr(1)-O(2W)   | 70.8(4)   | O(3W)-Sr(1)-Sr(2)    | 97.0(3)   |
| O(4W)-Sr(1)-O(3W)   | 71.5(4)   | O(6W)-Sr(1)-Sr(2)    | 41.8(3)   |
| O(5W)-Sr(1)-O(3W)   | 134.4(4)  | O(9)#5-Sr(1)-Sr(2)   | 82.9(3)   |
| O(19)-Sr(1)-O(3W)   | 106.4(5)  | O(1W)-Sr(1)-Sr(2)    | 122.2(3)  |

---

|                    |          |                     |            |
|--------------------|----------|---------------------|------------|
| O(2W)-Sr(1)-O(3W)  | 72.2(5)  | O(10W)-Sr(1)-Sr(2)  | 41.9(3)    |
| O(4W)-Sr(1)-O(6W)  | 84.8(5)  | Na(1)#1-Sr(1)-Sr(2) | 158.48(13) |
| O(5W)-Sr(1)-O(6W)  | 72.3(4)  | O(7)#5-Sr(2)-O(5)#6 | 95.2(4)    |
| O(19)-Sr(1)-O(6W)  | 127.6(4) | O(7)#5-Sr(2)-O(9W)  | 145.8(5)   |
| O(2W)-Sr(1)-O(6W)  | 147.1(4) | O(5)#6-Sr(2)-O(9W)  | 104.3(5)   |
| O(3W)-Sr(1)-O(6W)  | 76.0(5)  | O(7)#5-Sr(2)-O(5W)  | 87.0(4)    |
| O(4W)-Sr(1)-O(9)#5 | 68.8(4)  | O(5)#6-Sr(2)-O(5W)  | 144.3(4)   |
| O(5W)-Sr(1)-O(9)#5 | 67.4(4)  | O(9W)-Sr(2)-O(5W)   | 92.8(5)    |
| O(19)-Sr(1)-O(9)#5 | 123.4(4) | O(7)#5-Sr(2)-O(8W)  | 74.1(5)    |
| O(2W)-Sr(1)-O(9)#5 | 125.1(4) | O(5)#6-Sr(2)-O(8W)  | 79.0(5)    |
| O(3W)-Sr(1)-O(9)#5 | 130.1(5) | O(9W)-Sr(2)-O(8W)   | 82.4(5)    |
| O(6W)-Sr(1)-O(9)#5 | 71.4(4)  | O(5W)-Sr(2)-O(8W)   | 135.0(5)   |
| O(4W)-Sr(1)-O(1W)  | 88.0(4)  | O(7)#5-Sr(2)-O(7W)  | 75.6(5)    |
| O(5W)-Sr(1)-O(1W)  | 83.9(4)  | O(5)#6-Sr(2)-O(7W)  | 147.9(5)   |
| O(19)-Sr(1)-O(1W)  | 72.9(4)  | O(9W)-Sr(2)-O(7W)   | 73.0(5)    |
| O(2W)-Sr(1)-O(1W)  | 70.4(4)  | O(5W)-Sr(2)-O(7W)   | 66.9(5)    |
| O(3W)-Sr(1)-O(1W)  | 140.4(4) | O(8W)-Sr(2)-O(7W)   | 69.0(6)    |
| O(21)-W(2)-O(11)   | 82.3(5)  | O(7)#5-Sr(2)-O(10W) | 135.5(4)   |
| O(18)-W(2)-O(11)   | 81.9(5)  | O(5)#6-Sr(2)-O(10W) | 85.5(4)    |
| O(17)-W(2)-O(6)    | 161.8(5) | O(9W)-Sr(2)-O(10W)  | 74.7(5)    |
| O(3)-W(2)-O(6)     | 89.9(4)  | O(5W)-Sr(2)-O(10W)  | 69.0(4)    |
| O(21)-W(2)-O(6)    | 86.3(5)  | O(8W)-Sr(2)-O(10W)  | 148.1(5)   |
| O(18)-W(2)-O(6)    | 70.7(4)  | O(7W)-Sr(2)-O(10W)  | 122.7(5)   |
| O(11)-W(2)-O(6)    | 71.8(4)  | O(7)#5-Sr(2)-O(6W)  | 71.5(4)    |
| O(17)-W(2)-Na(1)   | 64.0(4)  | O(5)#6-Sr(2)-O(6W)  | 75.7(4)    |
| O(3)-W(2)-Na(1)    | 127.8(4) | O(9W)-Sr(2)-O(6W)   | 140.2(5)   |
| O(21)-W(2)-Na(1)   | 46.6(4)  | O(5W)-Sr(2)-O(6W)   | 71.3(4)    |
| O(18)-W(2)-Na(1)   | 136.5(3) | O(8W)-Sr(2)-O(6W)   | 134.6(5)   |
| O(11)-W(2)-Na(1)   | 62.2(3)  | O(7W)-Sr(2)-O(6W)   | 127.3(5)   |
| O(6)-W(2)-Na(1)    | 115.5(3) | O(10W)-Sr(2)-O(6W)  | 65.6(4)    |
| O(19)-W(3)-O(5)    | 101.9(6) | O(7)#5-Sr(2)-Sr(1)  | 95.0(3)    |
| O(19)-W(3)-O(14)   | 100.1(5) | O(5)#6-Sr(2)-Sr(1)  | 106.0(3)   |
| O(5)-W(3)-O(14)    | 97.4(5)  | O(9W)-Sr(2)-Sr(1)   | 105.8(4)   |
| O(19)-W(3)-O(10)   | 93.8(5)  | O(5W)-Sr(2)-Sr(1)   | 38.5(3)    |
| O(5)-W(3)-O(10)    | 97.4(5)  | O(8W)-Sr(2)-Sr(1)   | 168.5(4)   |
| O(14)-W(3)-O(10)   | 157.2(5) | O(7W)-Sr(2)-Sr(1)   | 105.4(4)   |
| O(19)-W(3)-O(4)    | 162.2(5) | O(10W)-Sr(2)-Sr(1)  | 43.3(3)    |
| O(5)-W(3)-O(4)     | 92.5(5)  | O(6W)-Sr(2)-Sr(1)   | 40.6(3)    |
| O(14)-W(3)-O(4)    | 88.3(4)  | O(7)-W(1)-O(1)      | 103.1(5)   |
| O(10)-W(3)-O(4)    | 73.8(4)  | O(7)-W(1)-O(4)      | 102.5(5)   |
| O(19)-W(3)-O(3)    | 90.1(5)  | O(1)-W(1)-O(4)      | 94.0(5)    |
| O(5)-W(3)-O(3)     | 167.7(5) | O(7)-W(1)-O(18)#3   | 98.7(5)    |
| O(14)-W(3)-O(3)    | 82.9(4)  | O(1)-W(1)-O(18)#3   | 92.0(5)    |
| O(10)-W(3)-O(3)    | 79.0(4)  | O(4)-W(1)-O(18)#3   | 156.0(5)   |

---

---

|                    |          |                       |           |
|--------------------|----------|-----------------------|-----------|
| O(4)-W(3)-O(3)     | 75.2(4)  | O(7)-W(1)-O(16)#3     | 96.5(5)   |
| O(12)-W(4)-O(2)    | 103.0(6) | O(1)-W(1)-O(16)#3     | 160.3(4)  |
| O(12)-W(4)-O(8)    | 97.5(5)  | O(4)-W(1)-O(16)#3     | 84.1(5)   |
| O(2)-W(4)-O(8)     | 101.2(5) | O(18)#3-W(1)-O(16)#3  | 82.5(4)   |
| O(12)-W(4)-O(10)   | 98.2(5)  | O(7)-W(1)-O(6)#3      | 164.9(5)  |
| O(2)-W(4)-O(10)    | 98.1(5)  | O(1)-W(1)-O(6)#3      | 88.5(5)   |
| O(8)-W(4)-O(10)    | 151.6(5) | O(4)-W(1)-O(6)#3      | 86.0(4)   |
| O(12)-W(4)-O(4)    | 92.3(5)  | O(18)#3-W(1)-O(6)#3   | 71.0(4)   |
| O(2)-W(4)-O(4)     | 163.4(5) | O(16)#3-W(1)-O(6)#3   | 71.7(4)   |
| O(8)-W(4)-O(4)     | 83.0(5)  | O(17)-W(2)-O(3)       | 104.5(5)  |
| O(10)-W(4)-O(4)    | 72.9(4)  | O(17)-W(2)-O(21)      | 102.9(5)  |
| O(12)-W(4)-O(21)   | 166.6(5) | O(3)-W(2)-O(21)       | 95.3(5)   |
| O(2)-W(4)-O(21)    | 88.7(5)  | O(17)-W(2)-O(18)      | 97.0(5)   |
| O(8)-W(4)-O(21)    | 73.5(4)  | O(3)-W(2)-O(18)       | 93.8(5)   |
| O(10)-W(4)-O(21)   | 86.4(4)  | O(21)-W(2)-O(18)      | 155.2(5)  |
| O(4)-W(4)-O(21)    | 77.0(4)  | O(17)-W(2)-O(11)      | 93.7(5)   |
| O(12)-W(4)-Na(1)   | 139.8(4) | O(3)-W(2)-O(11)       | 161.7(4)  |
| O(2)-W(4)-Na(1)    | 38.0(5)  | O(15)-Na(1)-O(1W)#1   | 87.3(5)   |
| O(8)-W(4)-Na(1)    | 85.5(4)  | O(17)#1-Na(1)-O(2)    | 88.1(5)   |
| O(10)-W(4)-Na(1)   | 97.4(4)  | O(15)-Na(1)-O(2)      | 84.4(5)   |
| O(4)-W(4)-Na(1)    | 127.7(3) | O(1W)#1-Na(1)-O(2)    | 116.8(5)  |
| O(21)-W(4)-Na(1)   | 50.9(3)  | O(17)#1-Na(1)-O(2W)#1 | 83.4(5)   |
| O(20)-W(5)-O(16)   | 101.9(5) | O(15)-Na(1)-O(2W)#1   | 104.2(5)  |
| O(20)-W(5)-O(11)   | 101.8(5) | O(1W)#1-Na(1)-O(2W)#1 | 77.6(5)   |
| O(16)-W(5)-O(11)   | 92.3(5)  | O(2)-Na(1)-O(2W)#1    | 164.0(6)  |
| O(20)-W(5)-O(14)#3 | 100.7(5) | O(17)#1-Na(1)-O(21)   | 112.5(5)  |
| O(16)-W(5)-O(14)#3 | 87.3(5)  | O(15)-Na(1)-O(21)     | 65.1(4)   |
| O(11)-W(5)-O(14)#3 | 157.1(4) | O(1W)#1-Na(1)-O(21)   | 152.2(5)  |
| O(20)-W(5)-O(13)   | 101.0(5) | O(2)-Na(1)-O(21)      | 66.1(4)   |
| O(16)-W(5)-O(13)   | 156.4(5) | O(2W)#1-Na(1)-O(21)   | 104.8(5)  |
| O(11)-W(5)-O(13)   | 88.8(5)  | O(17)#1-Na(1)-W(6)    | 151.5(4)  |
| O(14)#3-W(5)-O(13) | 82.7(5)  | O(15)-Na(1)-W(6)      | 25.9(3)   |
| O(20)-W(5)-O(6)    | 177.5(5) | O(1W)#1-Na(1)-W(6)    | 113.0(4)  |
| O(16)-W(5)-O(6)    | 75.9(5)  | O(2)-Na(1)-W(6)       | 76.1(3)   |
| O(11)-W(5)-O(6)    | 77.3(4)  | O(2W)#1-Na(1)-W(6)    | 105.6(4)  |
| O(14)#3-W(5)-O(6)  | 80.4(4)  | O(21)-Na(1)-W(6)      | 39.3(2)   |
| O(13)-W(5)-O(6)    | 81.3(5)  | O(17)#1-Na(1)-W(4)    | 101.3(4)  |
| O(9)-W(6)-O(15)    | 103.0(5) | O(15)-Na(1)-W(4)      | 72.2(3)   |
| O(9)-W(6)-O(13)    | 100.3(5) | O(1W)#1-Na(1)-W(4)    | 136.5(4)  |
| O(15)-W(6)-O(13)   | 99.0(5)  | O(2)-Na(1)-W(4)       | 26.3(3)   |
| O(9)-W(6)-O(8)     | 96.0(5)  | O(2W)#1-Na(1)-W(4)    | 143.7(4)  |
| O(15)-W(6)-O(8)    | 93.9(5)  | O(21)-Na(1)-W(4)      | 39.9(2)   |
| O(13)-W(6)-O(8)    | 156.4(5) | W(6)-Na(1)-W(4)       | 55.57(11) |
| O(9)-W(6)-O(1)     | 91.1(5)  | O(17)#1-Na(1)-W(2)    | 90.3(4)   |

---

|                       |          |                       |            |
|-----------------------|----------|-----------------------|------------|
| O(15)-W(6)-O(1)       | 164.5(5) | O(15)-Na(1)-W(2)      | 89.9(4)    |
| O(13)-W(6)-O(1)       | 84.5(4)  | O(1W)#1-Na(1)-W(2)    | 158.6(4)   |
| O(8)-W(6)-O(1)        | 78.1(4)  | O(2)-Na(1)-W(2)       | 84.0(4)    |
| O(9)-W(6)-O(21)       | 164.8(5) | O(2W)#1-Na(1)-W(2)    | 82.5(3)    |
| O(15)-W(6)-O(21)      | 88.3(5)  | O(21)-Na(1)-W(2)      | 30.2(2)    |
| O(13)-W(6)-O(21)      | 87.6(5)  | W(6)-Na(1)-W(2)       | 64.88(13)  |
| O(8)-W(6)-O(21)       | 73.0(4)  | W(4)-Na(1)-W(2)       | 61.64(12)  |
| O(1)-W(6)-O(21)       | 76.7(4)  | O(17)#1-Na(1)-Sr(1)#1 | 103.7(4)   |
| O(9)-W(6)-Na(1)       | 139.5(4) | O(15)-Na(1)-Sr(1)#1   | 82.9(3)    |
| O(15)-W(6)-Na(1)      | 36.9(4)  | O(1W)#1-Na(1)-Sr(1)#1 | 42.0(3)    |
| O(13)-W(6)-Na(1)      | 93.3(4)  | O(2)-Na(1)-Sr(1)#1    | 155.7(4)   |
| O(8)-W(6)-Na(1)       | 85.2(3)  | O(2W)#1-Na(1)-Sr(1)#1 | 40.4(3)    |
| O(1)-W(6)-Na(1)       | 128.2(3) | O(21)-Na(1)-Sr(1)#1   | 125.5(3)   |
| O(21)-W(6)-Na(1)      | 51.6(3)  | W(6)-Na(1)-Sr(1)#1    | 100.10(18) |
| O(17)#1-Na(1)-O(15)   | 172.4(5) | W(4)-Na(1)-Sr(1)#1    | 155.0(2)   |
| O(17)#1-Na(1)-O(1W)#1 | 95.2(5)  | W(2)-Na(1)-Sr(1)#1    | 116.6(2)   |

Symmetry code for **3**: #1 -x+1, -y, -z+1; #2 x, -y+1/2, z-1/2; #3 -x+2, -y, -z+1; #4 x, y, z-1; #5 x, y, z+1; #6 x, -y+1/2, z+1/2.

Table S4. Selected bond lengths [Å] and bond angles (°) for the compound **4**.

|              |           |               |           |
|--------------|-----------|---------------|-----------|
| O(1)-W(2)    | 1.767(17) | O(18)-W(2)    | 1.876(15) |
| O(1)-Ba(2)#1 | 2.512(17) | O(18)-W(5)#2  | 1.986(15) |
| O(2)-W(5)    | 1.851(17) | O(19)-W(4)    | 1.763(17) |
| O(2)-W(3)    | 2.123(18) | O(19)-Na(1)#3 | 2.41(2)   |
| O(3)-W(1)#2  | 1.789(16) | O(20)-W(6)    | 1.731(17) |
| O(3)-W(6)    | 2.184(16) | O(20)-Na(1)#3 | 2.43(2)   |
| O(4)-W(5)    | 1.866(17) | O(21)-W(3)    | 1.779(16) |
| O(4)-W(1)    | 2.073(16) | O(21)-W(2)    | 2.215(16) |
| O(5)-W(3)    | 1.892(16) | OW1-Ba(2)     | 2.71(2)   |
| O(5)-W(4)    | 2.274(16) | OW2-Ba(2)     | 2.56(2)   |
| O(5)-W(6)    | 2.292(15) | OW4-Na(1)     | 2.51(2)   |
| O(5)-Na(1)#3 | 2.76(2)   | OW4-Ba(1)#3   | 2.641(18) |
| O(6)-W(1)    | 1.737(16) | OW7-Ba(2)     | 2.60(2)   |
| O(6)-Ba(2)#4 | 2.480(16) | OW11-Ba(1)    | 2.595(18) |
| O(7)-W(6)    | 1.756(17) | OW11-Ba(2)    | 2.620(19) |
| O(7)-Ba(1)#5 | 2.698(18) | OW12-Ba(1)    | 2.688(19) |
| O(8)-W(2)    | 1.732(17) | OW12-Ba(2)    | 2.742(17) |
| O(8)-Ba(1)#3 | 2.605(17) | OW13-Ba(2)    | 2.701(18) |
| O(9)-W(3)    | 1.941(16) | OW13-Ba(1)    | 2.81(2)   |
| O(9)-W(1)    | 1.968(16) | OW14-Na(1)#3  | 2.48(2)   |

|                     |           |                      |           |
|---------------------|-----------|----------------------|-----------|
| O(10)-W(6)          | 1.911(17) | OW14-Ba(1)           | 2.676(19) |
| O(10)-W(5)          | 1.921(16) | OW15-Ba(1)           | 2.517(19) |
| O(11)-W(3)          | 1.716(17) | OW16-Ba(1)           | 2.63(2)   |
| O(11)-Na(1)         | 2.27(2)   | Ba(1)-O(8)#3         | 2.605(17) |
| O(12)-W(1)          | 1.881(15) | Ba(1)-OW4#3          | 2.641(18) |
| O(12)-W(2)#2        | 2.215(15) | Ba(1)-O(7)#5         | 2.698(18) |
| O(12)-W(4)#2        | 2.285(15) | Ba(2)-O(6)#6         | 2.480(16) |
| O(13)-W(4)          | 1.926(17) | Ba(2)-O(1)#7         | 2.512(17) |
| O(13)-W(2)          | 1.974(16) | W(1)-O(3)#2          | 1.789(16) |
| O(14)-W(4)          | 1.767(19) | W(2)-O(12)#2         | 2.215(15) |
| O(15)-W(4)          | 1.912(16) | W(4)-O(12)#2         | 2.285(15) |
| O(15)-W(6)          | 1.955(16) | W(5)-O(18)#2         | 1.986(15) |
| O(16)-W(5)          | 1.740(17) | Na(1)-O(19)#3        | 2.41(2)   |
| O(17)-W(5)          | 2.244(16) | Na(1)-O(20)#3        | 2.43(2)   |
| O(17)-W(1)          | 2.249(16) | Na(1)-OW14#3         | 2.48(2)   |
| O(17)-W(3)          | 2.257(15) | Na(1)-O(5)#3         | 2.76(2)   |
| W(2)-O(1)-Ba(2)#1   | 153.3(10) | W(4)-O(5)-W(6)       | 92.9(6)   |
| W(5)-O(2)-W(3)      | 114.2(8)  | W(3)-O(5)-Na(1)#3    | 103.4(7)  |
| W(1)#2-O(3)-W(6)    | 138.0(8)  | W(4)-O(5)-Na(1)#3    | 89.9(6)   |
| W(5)-O(4)-W(1)      | 115.7(8)  | W(6)-O(5)-Na(1)#3    | 89.3(6)   |
| W(3)-O(5)-W(4)      | 127.1(8)  | W(1)-O(6)-Ba(2)#4    | 153.9(9)  |
| W(3)-O(5)-W(6)      | 137.3(8)  | W(6)-O(7)-Ba(1)#5    | 149.8(9)  |
| W(2)-O(8)-Ba(1)#3   | 153.6(10) | O(8)#3-Ba(1)-O(7)#5  | 124.0(6)  |
| W(3)-O(9)-W(1)      | 119.7(8)  | OW16-Ba(1)-O(7)#5    | 127.7(7)  |
| W(6)-O(10)-W(5)     | 146.4(9)  | OW4#3-Ba(1)-O(7)#5   | 124.7(5)  |
| W(3)-O(11)-Na(1)    | 154.7(10) | OW14-Ba(1)-O(7)#5    | 65.8(5)   |
| W(1)-O(12)-W(2)#2   | 138.2(8)  | OW12-Ba(1)-O(7)#5    | 71.0(5)   |
| W(1)-O(12)-W(4)#2   | 126.4(8)  | OW15-Ba(1)-OW13      | 136.5(6)  |
| W(2)#2-O(12)-W(4)#2 | 94.6(6)   | OW11-Ba(1)-OW13      | 67.8(6)   |
| W(4)-O(13)-W(2)     | 116.1(8)  | O(8)#3-Ba(1)-OW13    | 66.6(5)   |
| W(4)-O(15)-W(6)     | 117.7(8)  | OW16-Ba(1)-OW13      | 70.5(7)   |
| W(5)-O(17)-W(1)     | 95.9(6)   | OW4#3-Ba(1)-OW13     | 110.6(5)  |
| W(5)-O(17)-W(3)     | 95.8(6)   | OW14-Ba(1)-OW13      | 137.0(6)  |
| W(1)-O(17)-W(3)     | 97.2(6)   | OW12-Ba(1)-OW13      | 65.3(5)   |
| W(2)-O(18)-W(5)#2   | 145.7(9)  | O(7)#5-Ba(1)-OW13    | 124.4(5)  |
| W(4)-O(19)-Na(1)#3  | 116.6(9)  | OW15-Ba(1)-Na(1)#3   | 66.4(5)   |
| W(6)-O(20)-Na(1)#3  | 117.1(9)  | OW11-Ba(1)-Na(1)#3   | 120.1(5)  |
| W(3)-O(21)-W(2)     | 140.4(9)  | O(8)#3-Ba(1)-Na(1)#3 | 81.9(4)   |
| Na(1)-OW4-Ba(1)#3   | 102.1(7)  | OW16-Ba(1)-Na(1)#3   | 104.0(6)  |
| Ba(1)-OW11-Ba(2)    | 102.7(6)  | OW4#3-Ba(1)-Na(1)#3  | 37.7(5)   |
| Ba(1)-OW12-Ba(2)    | 97.2(6)   | OW14-Ba(1)-Na(1)#3   | 37.3(5)   |
| Ba(2)-OW13-Ba(1)    | 95.2(6)   | OW12-Ba(1)-Na(1)#3   | 150.2(4)  |
| Na(1)#3-OW14-Ba(1)  | 101.9(7)  | O(7)#5-Ba(1)-Na(1)#3 | 88.4(4)   |
| OW15-Ba(1)-OW11     | 135.1(6)  | OW13-Ba(1)-Na(1)#3   | 143.3(4)  |

---

|                    |          |                     |          |
|--------------------|----------|---------------------|----------|
| OW15-Ba(1)-O(8)#3  | 146.1(7) | OW15-Ba(1)-Ba(2)    | 126.9(5) |
| OW11-Ba(1)-O(8)#3  | 70.8(6)  | OW11-Ba(1)-Ba(2)    | 38.9(4)  |
| OW15-Ba(1)-OW16    | 70.7(7)  | O(8)#3-Ba(1)-Ba(2)  | 86.9(4)  |
| OW11-Ba(1)-OW16    | 134.6(7) | OW16-Ba(1)-Ba(2)    | 96.4(5)  |
| O(8)#3-Ba(1)-OW16  | 108.1(7) | OW4#3-Ba(1)-Ba(2)   | 151.2(4) |
| OW15-Ba(1)-OW4#3   | 76.0(6)  | OW14-Ba(1)-Ba(2)    | 122.2(4) |
| OW11-Ba(1)-OW4#3   | 138.9(6) | OW12-Ba(1)-Ba(2)    | 41.9(4)  |
| O(8)#3-Ba(1)-OW4#3 | 71.6(5)  | O(7)#5-Ba(1)-Ba(2)  | 83.1(4)  |
| OW16-Ba(1)-OW4#3   | 73.4(7)  | OW13-Ba(1)-Ba(2)    | 41.3(4)  |
| OW15-Ba(1)-OW14    | 86.4(6)  | Na(1)#3-Ba(1)-Ba(2) | 158.9(2) |
| OW11-Ba(1)-OW14    | 83.5(6)  | O(6)#6-Ba(2)-O(1)#7 | 97.8(5)  |
| O(8)#3-Ba(1)-OW14  | 74.2(6)  | O(6)#6-Ba(2)-OW2    | 145.3(7) |
| OW16-Ba(1)-OW14    | 141.3(7) | O(1)#7-Ba(2)-OW2    | 101.5(7) |
| OW4#3-Ba(1)-OW14   | 71.0(6)  | O(6)#6-Ba(2)-OW7    | 73.7(6)  |
| OW15-Ba(1)-OW12    | 85.7(6)  | O(1)#7-Ba(2)-OW7    | 78.0(6)  |
| OW11-Ba(1)-OW12    | 72.4(6)  | OW2-Ba(2)-OW7       | 82.5(7)  |
| O(8)#3-Ba(1)-OW12  | 127.4(5) | O(6)#6-Ba(2)-OW11   | 86.5(6)  |
| OW16-Ba(1)-OW12    | 74.5(7)  | O(1)#7-Ba(2)-OW11   | 143.5(6) |
| OW4#3-Ba(1)-OW12   | 146.8(6) | OW2-Ba(2)-OW11      | 94.4(7)  |
| OW14-Ba(1)-OW12    | 136.0(6) | OW7-Ba(2)-OW11      | 137.1(6) |
| OW15-Ba(1)-O(7)#5  | 68.7(6)  | O(6)#6-Ba(2)-OW13   | 136.0(5) |
| OW11-Ba(1)-O(7)#5  | 67.3(6)  | O(1)#7-Ba(2)-OW13   | 83.4(6)  |
| OW2-Ba(2)-OW13     | 75.1(7)  | O(18)-W(2)-O(13)    | 157.9(7) |
| OW7-Ba(2)-OW13     | 147.3(6) | O(8)-W(2)-O(12)#2   | 162.8(7) |
| OW11-Ba(2)-OW13    | 69.2(6)  | O(1)-W(2)-O(12)#2   | 91.5(7)  |
| O(6)#6-Ba(2)-OW1   | 73.8(6)  | O(18)-W(2)-O(12)#2  | 89.1(6)  |
| O(1)#7-Ba(2)-OW1   | 148.5(7) | O(13)-W(2)-O(12)#2  | 74.2(6)  |
| OW2-Ba(2)-OW1      | 74.6(7)  | O(8)-W(2)-O(21)     | 89.9(7)  |
| OW7-Ba(2)-OW1      | 70.5(7)  | O(1)-W(2)-O(21)     | 167.1(7) |
| OW11-Ba(2)-OW1     | 67.5(7)  | O(18)-W(2)-O(21)    | 84.2(6)  |
| OW13-Ba(2)-OW1     | 124.0(6) | O(13)-W(2)-O(21)    | 77.7(6)  |
| O(6)#6-Ba(2)-OW12  | 71.5(5)  | O(12)#2-W(2)-O(21)  | 75.6(6)  |
| O(1)#7-Ba(2)-OW12  | 76.0(6)  | O(11)-W(3)-O(21)    | 103.4(7) |
| OW2-Ba(2)-OW12     | 141.2(7) | O(11)-W(3)-O(5)     | 101.5(7) |
| OW7-Ba(2)-OW12     | 132.6(6) | O(21)-W(3)-O(5)     | 95.2(7)  |
| OW11-Ba(2)-OW12    | 71.1(6)  | O(11)-W(3)-O(9)     | 97.2(7)  |
| OW13-Ba(2)-OW12    | 66.1(5)  | O(21)-W(3)-O(9)     | 93.9(7)  |
| OW1-Ba(2)-OW12     | 126.7(6) | O(5)-W(3)-O(9)      | 156.7(7) |
| O(6)#6-Ba(2)-Ba(1) | 95.3(4)  | O(11)-W(3)-O(2)     | 93.5(7)  |
| O(1)#7-Ba(2)-Ba(1) | 105.1(4) | O(21)-W(3)-O(2)     | 163.0(7) |
| OW2-Ba(2)-Ba(1)    | 106.9(6) | O(5)-W(3)-O(2)      | 83.3(7)  |
| OW7-Ba(2)-Ba(1)    | 169.0(5) | O(9)-W(3)-O(2)      | 81.8(7)  |
| OW11-Ba(2)-Ba(1)   | 38.4(4)  | O(11)-W(3)-O(17)    | 162.3(7) |
| OW13-Ba(2)-Ba(1)   | 43.4(4)  | O(21)-W(3)-O(17)    | 90.8(6)  |

---



---

|                      |          |                       |          |
|----------------------|----------|-----------------------|----------|
| OW1-Ba(2)-Ba(1)      | 105.9(5) | O(5)-W(3)-O(17)       | 87.5(6)  |
| OW12-Ba(2)-Ba(1)     | 40.9(4)  | O(9)-W(3)-O(17)       | 71.0(6)  |
| O(6)-W(1)-O(3)#2     | 103.2(7) | O(2)-W(3)-O(17)       | 72.3(6)  |
| O(6)-W(1)-O(12)      | 102.5(7) | O(11)-W(3)-Na(1)#3    | 63.1(6)  |
| O(3)#2-W(1)-O(12)    | 94.4(7)  | O(21)-W(3)-Na(1)#3    | 127.5(6) |
| O(6)-W(1)-O(9)       | 98.0(7)  | O(5)-W(3)-Na(1)#3     | 46.6(5)  |
| O(3)#2-W(1)-O(9)     | 91.5(7)  | O(9)-W(3)-Na(1)#3     | 136.1(5) |
| O(12)-W(1)-O(9)      | 156.7(7) | O(2)-W(3)-Na(1)#3     | 62.4(5)  |
| O(6)-W(1)-O(4)       | 96.1(7)  | O(17)-W(3)-Na(1)#3    | 116.1(4) |
| O(3)#2-W(1)-O(4)     | 160.5(7) | O(19)-W(4)-O(14)      | 103.6(9) |
| O(12)-W(1)-O(4)      | 84.4(7)  | O(19)-W(4)-O(15)      | 100.1(8) |
| O(9)-W(1)-O(4)       | 82.7(7)  | O(14)-W(4)-O(15)      | 97.0(8)  |
| O(6)-W(1)-O(17)      | 164.4(6) | O(19)-W(4)-O(13)      | 97.2(8)  |
| O(3)#2-W(1)-O(17)    | 88.2(6)  | O(14)-W(4)-O(13)      | 99.6(8)  |
| O(12)-W(1)-O(17)     | 86.9(6)  | O(15)-W(4)-O(13)      | 152.5(7) |
| O(9)-W(1)-O(17)      | 70.8(6)  | O(19)-W(4)-O(5)       | 87.5(7)  |
| O(4)-W(1)-O(17)      | 72.3(6)  | O(14)-W(4)-O(5)       | 167.3(7) |
| O(8)-W(2)-O(1)       | 102.6(8) | O(15)-W(4)-O(5)       | 74.7(6)  |
| O(8)-W(2)-O(18)      | 98.8(8)  | O(13)-W(4)-O(5)       | 84.9(6)  |
| O(1)-W(2)-O(18)      | 96.8(8)  | O(19)-W(4)-O(12)#2    | 162.3(7) |
| O(8)-W(2)-O(13)      | 93.9(8)  | O(14)-W(4)-O(12)#2    | 92.8(7)  |
| O(1)-W(2)-O(13)      | 98.0(8)  | O(15)-W(4)-O(12)#2    | 84.0(6)  |
| O(13)-W(4)-O(12)#2   | 73.5(6)  | O(11)-Na(1)-O(19)#3   | 90.1(7)  |
| O(5)-W(4)-O(12)#2    | 77.0(6)  | O(11)-Na(1)-O(20)#3   | 174.1(8) |
| O(19)-W(4)-Na(1)#3   | 37.2(7)  | O(19)#3-Na(1)-O(20)#3 | 84.3(7)  |
| O(14)-W(4)-Na(1)#3   | 139.6(6) | O(11)-Na(1)-OW14#3    | 94.0(7)  |
| O(15)-W(4)-Na(1)#3   | 85.3(5)  | O(19)#3-Na(1)-OW14#3  | 116.6(8) |
| O(13)-W(4)-Na(1)#3   | 95.9(5)  | O(20)#3-Na(1)-OW14#3  | 86.7(7)  |
| O(5)-W(4)-Na(1)#3    | 50.5(4)  | O(11)-Na(1)-OW4       | 82.9(7)  |
| O(12)#2-W(4)-Na(1)#3 | 127.4(5) | O(19)#3-Na(1)-OW4     | 165.7(9) |
| O(16)-W(5)-O(2)      | 102.7(8) | O(20)#3-Na(1)-OW4     | 103.0(7) |
| O(16)-W(5)-O(4)      | 101.7(8) | OW14#3-Na(1)-OW4      | 76.5(7)  |
| O(2)-W(5)-O(4)       | 92.2(7)  | O(11)-Na(1)-O(5)#3    | 113.8(7) |
| O(16)-W(5)-O(10)     | 100.2(7) | O(19)#3-Na(1)-O(5)#3  | 65.6(6)  |
| O(2)-W(5)-O(10)      | 90.0(7)  | O(20)#3-Na(1)-O(5)#3  | 65.6(6)  |
| O(4)-W(5)-O(10)      | 156.9(7) | OW14#3-Na(1)-O(5)#3   | 152.2(7) |
| O(16)-W(5)-O(18)#2   | 98.4(7)  | OW4-Na(1)-O(5)#3      | 105.9(7) |
| O(2)-W(5)-O(18)#2    | 158.7(7) | O(11)-Na(1)-W(6)#3    | 153.5(6) |
| O(4)-W(5)-O(18)#2    | 86.5(7)  | O(19)#3-Na(1)-W(6)#3  | 75.6(5)  |
| O(10)-W(5)-O(18)#2   | 83.2(7)  | O(20)#3-Na(1)-W(6)#3  | 25.6(4)  |
| O(16)-W(5)-O(17)     | 177.9(7) | OW14#3-Na(1)-W(6)#3   | 112.2(5) |
| O(2)-W(5)-O(17)      | 77.6(6)  | OW4-Na(1)-W(6)#3      | 105.7(5) |
| O(4)-W(5)-O(17)      | 76.2(6)  | O(5)#3-Na(1)-W(6)#3   | 40.0(4)  |
| O(10)-W(5)-O(17)     | 81.8(6)  | O(11)-Na(1)-W(4)#3    | 103.4(5) |

---

---

|                      |          |                       |           |
|----------------------|----------|-----------------------|-----------|
| O(18)#2-W(5)-O(17)   | 81.4(6)  | O(19)#3-Na(1)-W(4)#3  | 26.2(4)   |
| O(20)-W(6)-O(7)      | 102.3(8) | O(20)#3-Na(1)-W(4)#3  | 72.2(5)   |
| O(20)-W(6)-O(10)     | 97.5(8)  | OW14#3-Na(1)-W(4)#3   | 136.1(7)  |
| O(7)-W(6)-O(10)      | 101.7(8) | OW4-Na(1)-W(4)#3      | 144.7(6)  |
| O(20)-W(6)-O(15)     | 94.2(8)  | O(5)#3-Na(1)-W(4)#3   | 39.6(4)   |
| O(7)-W(6)-O(15)      | 94.6(7)  | W(6)#3-Na(1)-W(4)#3   | 55.28(16) |
| O(10)-W(6)-O(15)     | 157.4(7) | O(11)-Na(1)-W(3)#3    | 91.8(6)   |
| O(20)-W(6)-O(3)      | 164.6(7) | O(19)#3-Na(1)-W(3)#3  | 84.3(5)   |
| O(7)-W(6)-O(3)       | 92.2(7)  | O(20)#3-Na(1)-W(3)#3  | 89.6(5)   |
| O(10)-W(6)-O(3)      | 84.7(6)  | OW14#3-Na(1)-W(3)#3   | 158.2(6)  |
| O(15)-W(6)-O(3)      | 79.1(6)  | OW4-Na(1)-W(3)#3      | 83.5(6)   |
| O(20)-W(6)-O(5)      | 87.9(7)  | O(5)#3-Na(1)-W(3)#3   | 29.9(4)   |
| O(7)-W(6)-O(5)       | 165.0(7) | W(6)#3-Na(1)-W(3)#3   | 65.0(2)   |
| O(10)-W(6)-O(5)      | 87.6(6)  | W(4)#3-Na(1)-W(3)#3   | 61.9(2)   |
| O(15)-W(6)-O(5)      | 73.5(6)  | O(11)-Na(1)-Ba(1)#3   | 102.3(5)  |
| O(3)-W(6)-O(5)       | 76.9(6)  | O(19)#3-Na(1)-Ba(1)#3 | 154.2(7)  |
| O(20)-W(6)-Na(1)#3   | 37.3(6)  | O(20)#3-Na(1)-Ba(1)#3 | 82.1(5)   |
| O(7)-W(6)-Na(1)#3    | 139.0(6) | OW14#3-Na(1)-Ba(1)#3  | 40.8(5)   |
| O(10)-W(6)-Na(1)#3   | 92.7(5)  | OW4-Na(1)-Ba(1)#3     | 40.2(4)   |
| O(15)-W(6)-Na(1)#3   | 84.9(5)  | O(5)#3-Na(1)-Ba(1)#3  | 126.5(5)  |
| O(3)-W(6)-Na(1)#3    | 127.5(4) | W(6)#3-Na(1)-Ba(1)#3  | 99.9(3)   |
| O(5)-W(6)-Na(1)#3    | 50.6(4)  | W(4)#3-Na(1)-Ba(1)#3  | 154.3(3)  |
| W(3)#3-Na(1)-Ba(1)#3 | 117.4(3) |                       |           |

---

Symmetry code for 4: #1 -x, y-1/2, -z+3/2; #2 -x+1, -y, -z+2; #3 -x, -y, -z+2; #4 x+1, y, z+1; #5 -x, -y, -z+1; #6 x-1, y, z-1; #7 -x, y+1/2, -z+3/2.
